# Supplementary material for: Human dynein–dynactin is a fast processive motor in living cells
Source: eLife. 2026 Mar 25;13:RP94963. doi: 10.7554/eLife.94963 (PMC13016606; doi:10.7554/eLife.94963)
Supplement: Figure 1—source data 1. [file elife-94963-fig1-data1.xlsx]

## Sheet: DHC-GFP
Timelapse	Movement Frames	Run time (s)	x-y (start)	Velocity um/sec	Run length (microns)	Intensity Frame
DHC_01_1	24-34	2.2	398153	0.98	2.156	32
DHC_01_2	7-13	1.4	320256	2.1	2.94	9
DHC_01_3 (nice kymo)	23-42	4	348297	1.4	5.6	24
DHC_01_4 (nice kymo)	27-40	2.8	321307	1.63	4.564	No
DHC_02_1	20-30	2.2	356185	1.02	2.244	25
DHC_02_2 (weak)	7-18	2.4	370167	1.6	3.84	No
DHC_02_3	27-30	0.8	?	1.5	1.2	No
DHC_02_4	34-39	1.2	341182	0.9	1.08	No
DHC_02_5	18-23	1.2	327162	1.82	2.184	No
DHC_02_5 (Nice slower kymo)	5-12	1.6	242283	0.73	1.168	7
DHC_03_1	34-48	3	294125	0.975	2.925	39
DHC_03_2	4-14	2.2	257222	1.14	2.508	12
DHC_03_3	40-52	2.8	259220	1.1	3.08	47
DHC_03_4	49-58	2	220221	2.23	4.46	58
DHC_03_5	16-24	1.8	244208	1.25	2.25	20
DHC_03_6	21-29	1.8	244208	1.66	2.988	26
DHC_03_7	53-60	NA		1.88	NA	54
DHC_03_8	55-60	NA		1.48	NA	59
DHC_03_9	27-42	3.2	286291	1.43	4.576	27
DHC_03_10	30-60	NA		0.72	NA	37	2 phases (averaged)
DHC_03_11	14-24	2.2	305293	1.46	3.212	18
DHC_03_12	26-37	2.4	305293	1.88	4.512	29	(maybe quant)
DHC_03_13	24-31	1.6	338230	0.65	1.04	25
DHC_03_14	30-42	2.6	338230	1.08	2.808	36
DHC_04_1	21-28	1.6	369243	1.84	2.944	22
DHC_04_2	23-38	3.2	350251	1.06	3.392	28
DHC_04_3 (perfect kymo)	37-49	2.6	339239	1.21	3.146	40
DHC_04_4	33-42	2	304255	0.98	1.96	40
DHC_04_5	51-57	1.4	314254	1.38	1.932	52
DHC_04_6	13-23	2.2	111,56	1.5	3.3	No
DHC_04_7	28-40	2.4	70117	0.6	1.44	29
DHC_04_8	31-35	0.8	304255	2.2	1.76	32
DHC_04_9	50-59	2	252259	1.4	2.8	50
DHC_04_10	50-58	1.8	223286	2.51	4.518	53
DHC_04_11	12-22	2.2	228283	0.99	2.178	19
DHC_06_01	33-40	1.6	225158	1.59	2.544	37
DHC_06_02	34-45	2.4	245161	0.87	2.088	41
DHC_06_03	26-32	1.4	268181	0.79	1.106	28
DHC_06_04	1-12	NA	257186	0.84	NA	8
DHC_06_05	36-44	1.8	304163	2.14	3.852	38
DHC_06_06	22-29	1.6	295117	0.37	0.592	17
DHC_06_07	8-16	1.8	184307	1.95	3.51	12
DHC_06_08	27-35	1.8	81194	1.76	3.168	32
DHC_07_01	25-60	7.2	200184	0.74	5.328	56
DHC_07_02	1-32	NA	182165	0.57	NA	19
DHC_07_03	1-9	NA	185162	0.89	NA	5
DHC_07_04	42-59	3.6	167195	0.47	1.692	52
DHC_07_05	40-51	2.4	320372	0.84	2.016	49
DHC_07_06	1-19	NA	378378	0.51	NA	5
DHC_07_07	44-60	NA	281314	0.85	NA	46
DHC_07_08	19-51	6.6	161309	0.71	4.686	36
DHC_07_09	38-58	4.2	161310	0.46	1.932	52
DHC_07_10	48-58	2.2	155304	0.53	1.166	52
DHC_07_11	1-60	NA	192307	0.47	NA	24
DHC_07_12	44-60	NA	193310	1.23	NA	46
DHC_07_13	9-51	8.6	267279	0.47	4.042	21	nice kymograph (slower)
DHC_07_14	37-46	2	237217	0.85	1.7	41
DHC_07_15	9-25	3.4	260191	0.65	2.21	16
DHC_07_16	1-14	NA	251169	0.8	NA	8
DHC_09_01	25-31	1.4	322177	0.74	1.036	28
DHC_09_02	34-41	1.6	366179	1.625	2.6	39
DHC_09_03	16-22	1.4	375226	1.37	1.918	21
DHC_09_04	22-28	1.4	381227	1.14	1.596	24
DHC_09_05	28-33	1.2	NA	1.56	1.872	No
DHC_09_06	47-56	2	304244	1.21	2.42	49	Perfect Example of all
DHC_09_07	50-57	1.6	282263	2.28	3.648	53
DHC_09_08	22-33	2.4	322259	0.85	2.04	33
DHC_09_09	10-16	1.4	324322	1.18	1.652	12
DHC_09_10	41-50	2	NA	1.23	2.46	No
DHC_09_11	23-30	1.6	343322	1.21	1.936	21
DHC_10_01				1.37
DHC_10_02				2.06
DHC_10_03				1.73
DHC_10_04	35-48	2.8	229131	0.83	2.324	41
DHC_10_05	40-46	1.4		1.82	2.548
DHC_10_06	53-60			1.48
DHC_10_07	32-43	2.4	295,48	0.77	1.848	36
DHC_10_08	5-12	1.6	315,63	1.95	3.12	5
DHC_10_09	10-22	2.6	384141	1.2	3.12	17	nice run kymograph
DHC_10_10	15-26	2.4	342153	1.17	2.808	17
DHC_10_11	12-19	1.6	389152	1.08	1.728	16
DHC_10_12	16-35	4	414180	1.54	6.16	20
DHC_10_13	26-33	1.6	431223	1.21	1.936	31
DHC_10_14	14-24	2.2	367209	1.3	2.86	17
DHC_11_01	15-28	2.8	371,77	0.8	2.24	19
DHC_11_02	42-58	3.4	383,94	0.38	1.292	47
DHC_11_03	5-24	4	394288	0.62	2.48	21
DHC_11_04	25-37	2.6	390297	0.89	2.314	26
DHC_11_05	25-60	7.2	369303	0.62	4.464	33
DHC_11_06	NA	NA	344236	0.51	NA	38
DHC_11_07	NA	NA	337234	0.35	NA	12
DHC_11_08	1-	NA	291285	0.65	NA	28
DHC_11_09	1-10	NA	313322	0.7	NA	3
DHC_11_10	8-19	2.4	320312	0.98	2.352	8
DHC_11_11	7-35	5.8	336303	0.84	4.872	32
DHC_11_12	25-57	6.6	277258	0.81	5.346	38
DHC_12_01	37-56	4	412296	1.88	7.52		megarun
DHC_12_02	1-34	6.8	346142	1.26	8.568		megarun-2 kymograph	kymograph
DHC_12_03	22-31	2		0.89	1.78
DHC_12_04	29-38	2		0.94	1.88

## Sheet: DHC Summary
	Run time (s)	Velocity um/sec	Run length (microns)
	2.2	0.98	2.156
	1.4	2.1	2.94
	4	1.4	5.6
	2.8	1.63	4.564
	2.2	1.02	2.244
	2.4	1.6	3.84
	0.8	1.5	1.2
	1.2	0.9	1.08
	1.2	1.82	2.184
	1.6	0.73	1.168
	3	0.975	2.925
	2.2	1.14	2.508
	2.8	1.1	3.08
	2	2.23	4.46
	1.8	1.25	2.25
	1.8	1.66	2.988
		1.88
		1.48
	3.2	1.43	4.576
		0.72
	2.2	1.46	3.212
	2.4	1.88	4.512
	1.6	0.65	1.04
	2.6	1.08	2.808
	1.6	1.84	2.944
	3.2	1.06	3.392
	2.6	1.21	3.146
	2	0.98	1.96
	1.4	1.38	1.932
	2.2	1.5	3.3
	2.4	0.6	1.44
	0.8	2.2	1.76
	2	1.4	2.8
	1.8	2.51	4.518
	2.2	0.99	2.178
	1.6	1.59	2.544
	2.4	0.87	2.088
	1.4	0.79	1.106
		0.84
	1.8	2.14	3.852
	1.6	0.37	0.592
	1.8	1.95	3.51
	1.8	1.76	3.168
	7.2	0.74	5.328
		0.57
		0.89
	3.6	0.47	1.692
	2.4	0.84	2.016
		0.51
		0.85
	6.6	0.71	4.686
	4.2	0.46	1.932
	2.2	0.53	1.166
		0.47
		1.23
	8.6	0.47	4.042
	2	0.85	1.7
	3.4	0.65	2.21
		0.8
	1.4	0.74	1.036
	1.6	1.625	2.6
	1.4	1.37	1.918
	1.4	1.14	1.596
	1.2	1.56	1.872
	2	1.21	2.42
	1.6	2.28	3.648
	2.4	0.85	2.04
	1.4	1.18	1.652
	2	1.23	2.46
	1.6	1.21	1.936
		1.37
		2.06
		1.73
	2.8	0.83	2.324
	1.4	1.82	2.548
		1.48
	2.4	0.77	1.848
	1.6	1.95	3.12
	2.6	1.2	3.12
	2.4	1.17	2.808
	1.6	1.08	1.728
	4	1.54	6.16
	1.6	1.21	1.936
	2.2	1.3	2.86
	4	1.88	7.52
	6.8	1.26	8.568
	2	0.89	1.78
	2	0.94	1.88
	2.8	0.8	2.24
	3.4	0.38	1.292
	4	0.62	2.48
	2.6	0.89	2.314
	7.2	0.62	4.464
		0.51
		0.35
		0.65
		0.7
	2.4	0.98	2.352
	5.8	0.84	4.872
	6.6	0.81	5.346
	Run time (s)	Velocity um/sec	Run length (microns)
AVG	2.59753	1.1666	2.82809
STDEV	1.56189	0.505282	1.45475
SEM	0.173543	0.0505282	0.161639
N	81	100	81

## Sheet: DHC directional switching
Timelapse	Movement Frames	Run time (s)	x-y (start)	Velocity um/sec	Run length (microns)		Switching	Notes
DHC_01_2	7-13	1.4	320256	2.1	2.94		No
DHC_01_3 (nice kymo)	23-42	4	348297	1.4	5.6		No
DHC_01_4 (nice kymo)	27-40	2.8	321307	1.63	4.564		No
DHC_02_2 (weak)	7-18	2.4	370167	1.6	3.84		No
DHC_03_11	14-24	2.2	305293	1.46	3.212		No
DHC_03_12	26-37	2.4	305293	1.88	4.512		No
DHC_03_3	40-52	2.8	259220	1.1	3.08		No
DHC_03_4	49-58	2	220221	2.23	4.46		No
DHC_03_6	21-29	1.8	244208	1.66	2.988		No
DHC_03_9	27-42	3.2	286291	1.43	4.576		No
DHC_04_1	21-28	1.6	369243	1.84	2.944		No
DHC_04_10	50-58	1.8	223286	2.51	4.518		No
DHC_04_2	23-38	3.2	350251	1.06	3.392		No	Definitely curved along path - presumably a curled MT
DHC_04_3 (perfect kymo)	37-49	2.6	339239	1.21	3.146		No
DHC_04_6	13-23	2.2	111,56	1.5	3.3		No	Curved path
DHC_06_05	36-44	1.8	304163	2.14	3.852		No
DHC_06_07	8-16	1.8	184307	1.95	3.51		No
DHC_06_08	27-35	1.8	81194	1.76	3.168		No
DHC_07_01	25-60	7.2	200184	0.74	5.328		No
DHC_07_08	19-51	6.6	161309	0.71	4.686		No	Pause with wiggle at the end but not a definite switching event
DHC_07_13	9-51	8.6	267279	0.47	4.042		No
DHC_09_07	50-57	1.6	282263	2.28	3.648		No
DHC_10_08	5-12	1.6	315,63	1.95	3.12		No
DHC_10_09	10-22	2.6	384141	1.2	3.12		No
DHC_10_12	16-35	4	414180	1.54	6.16		Maybe yes
DHC_11_05	25-60	7.2	369303	0.62	4.464		No
DHC_11_11	7-35	5.8	336303	0.84	4.872		No
DHC_11_12	25-57	6.6	277258	0.81	5.346		No
DHC_12_01	37-56	4	412296	1.88	7.52		No
DHC_12_02	1-34	6.8	346142	1.26	8.568		No
