# Supplementary material for: Human dynein–dynactin is a fast processive motor in living cells
Source: eLife. 2026 Mar 25;13:RP94963. doi: 10.7554/eLife.94963 (PMC13016606; doi:10.7554/eLife.94963)
Supplement: Figure 2—figure supplement 1—source data 1. [file elife-94963-fig2-figsupp1-data1.xlsx]

## Sheet: p50
Region Label	Region Area	Cytoplasm	Nucleus	Corrected
1	2.64062	77952	74508	3444
3	2.64062	78899	74697	4202
5	2.64062	77483	75812	1671
7	2.64062	75402	73633	1769
9	2.64062	74253	73157	1096
11	2.64062	76867	74883	1984
13	2.64062	79735	73534	6201
15	2.64062	75297	71627	3670
17	2.64062	78297	75064	3233
19	2.64062	77756	73888	3868
21	2.64062	77209	72343	4866
23	2.64062	78807	75497	3310
25	2.64062	78430	74157	4273

## Sheet: DHC
Region Label	Region Area	Cytoplasm	Nucleus	Corrected
1	2.64062	82609	74202	8407
3	2.64062	76024	69603	6421
5	2.64062	82249	69631	12618
7	2.64062	90739	75440	15299
9	2.64062	81439	71872	9567
11	2.64062	86051	76337	9714
13	2.64062	84217	72285	11932
15	2.64062	75951	70602	5349
17	2.64062	84865	73694	11171
19	2.64062	88538	74946	13592
21	2.64062	84759	73246	11513
23	2.64062	82853	74941	7912
25	2.64062	85810	73440	12370
27	2.64062	87498	75225	12273
29	2.64062	82021	70873	11148
31	2.64062	91038	74490	16548
33	2.64062	78877	70268	8609
35	2.64062	80673	72639	8034
37	2.64062	86136	74911	11225
39	2.64062	79862	71269	8593
41	2.64062	76141	70576	5565
43	2.64062	77914	68819	9095
45	2.64062	85195	73269	11926
47	2.64062	86187	73307	12880
49	2.64062	77448	72702	4746
51	2.64062	82658	70328	12330
53	2.64062	85994	75388	10606
55	2.64062	81412	70422	10990
57	2.64062	81474	70518	10956
59	2.64062	82814	73148	9666
61	2.64062	80420	72838	7582
