# Supplementary material for: Human dynein–dynactin is a fast processive motor in living cells
Source: eLife. 2026 Mar 25;13:RP94963. doi: 10.7554/eLife.94963 (PMC13016606; doi:10.7554/eLife.94963)
Supplement: Figure 2—source data 1. [file elife-94963-fig2-data1.xlsx]

## Sheet: p50
Timelapse	Movement Frames	Run time (s)	x-y (start)	Velocity um/sec	Run length (microns)	Intensity Frame
p50_01	26-36	2.2	275390	1.89	4.158
p50_03	1-8	1.6	315304	1.11	1.776
p50_04_1	12-21	2	367256	0.975	1.95
p50_04_2	17-24	1.6	348342	2.06	3.296
p50_04_3	40-46	1.4	360234	0.79	1.106
p50_04_4 (nice kymo)	37-50	2.8	219225	1.81	5.068
p50_04_5	11-23	2.6	282232	1.71	4.446
p50_05_01	54-59	1.2	80124	1.11	1.332	56
p50_05_02	42-52	2.2	106123	1.69	3.718	43
p50_06_01	16-35	4	310258	0.68	2.72	34
p50_06_02	38-45	1.6	310283	1.19	1.904	43
p50_06_03	29-35	1.4	312282	1.95	2.73	29
p50_06_04	14-18	1	268239	0.98	0.98	18
p50_06_05	49-59	2.2	264240	1.66	3.652	55
p50_06_06	24-34	2.2	10337	1.44	3.168	24
p50_06_07	10-20	2.2	30340	0.85	1.87	10
p50_06_08	45-58	2.8	67438	1.12	3.136	58
p50_07_01 (nice kymo)	5-22	3.6	317216	0.79	2.844	6
p50_07_02	45-54	2	239286	0.57	1.14	52
p50_07_03	49-57	1.8	287236	1.08	1.944	52
p50_07_04	20-51	6.4	234228	1	6.4	37
p50_07_05	11-18	1.6	297175	0.71	1.136	11
p50_07_06	41-56	3.2	298176	0.98	3.136	55
p50_07_07	6-22	3.4	334166	0.73	2.482	7
p50_07_08	4-22	3.8	317216	0.87	3.306	6
p50_07_09	1-9	NA	381278	1.06	NA	1
p50_07_10	24-32	1.8	384270	1.3	2.34	27
p50_07_11	1-13_pause_23-27	NA	399255	0.98	NA	26
p50_08_01	16-31	3.2	293218	1.78	5.696	23	Long and fast run
p50_09_01	6-18	2.6	272274	0.6	1.56	6
p50_10_01	36-46	2.2	285398	1.04	2.288	36
p50_10_02	49-59	2.2	268347	0.78	1.716	59
p50_10_03	NA	NA	NA	1.58	NA	NA
p50_10_04	29-38	2	247288	0.77	1.54	36
p50_10_05	30-37	1.6	134421	2.5	4	28
p50_10_06	21-25	1	137303	1.46	1.46	25
p50_10_07	51-59	1.8	NA	1.3	2.34	NA
p50_10_08	49-55	1.4	NA	1.41	1.974	NA
p50_10_09	42-47	1.2	NA	1.43	1.716	NA
p50_10_10	44-57	2.8	361100	1.16	3.248	56
p50_10_11	27-35	1.8	NA	1.06	1.908	NA
p50_10_12	17-22	1.2	370160	1.62	1.944	22
p50_10_13	52-58	1.4	420170	1.06	1.484	60
p50_10_14	26-37	2.4	NA	0.99	2.376	NA

## Sheet: p50 Summary
	Run time (s)	Velocity um/sec	Run length (microns)
	2.2	1.89	4.158
	1.6	1.11	1.776
	2	0.975	1.95
	1.6	2.06	3.296
	1.4	0.79	1.106
	2.8	1.81	5.068
	2.6	1.71	4.446
	1.2	1.11	1.332
	2.2	1.69	3.718
	4	0.68	2.72
	1.6	1.19	1.904
	1.4	1.95	2.73
	1	0.98	0.98
	2.2	1.66	3.652
	2.2	1.44	3.168
	2.2	0.85	1.87
	2.8	1.12	3.136
	3.6	0.79	2.844
	2	0.57	1.14
	1.8	1.08	1.944
	6.4	1	6.4
	1.6	0.71	1.136
	3.2	0.98	3.136
	3.4	0.73	2.482
	3.8	0.87	3.306
		1.06
	1.8	1.3	2.34
		0.98
	3.2	1.78	5.696
	2.6	0.6	1.56
	2.2	1.04	2.288
	2.2	0.78	1.716
		1.58
	2	0.77	1.54
	1.6	2.5	4
	1	1.46	1.46
	1.8	1.3	2.34
	1.4	1.41	1.974
	1.2	1.43	1.716
	2.8	1.16	3.248
	1.8	1.06	1.908
	1.2	1.62	1.944
	1.4	1.06	1.484
	2.4	0.99	2.376
	Run time (s)	Velocity um/sec	Run length (microns)
AVG	2.22927	1.21875	2.60946
STDEV	1.01544	0.438185	1.26347
SEM	0.158585	0.0660589	0.197321
N	41	44	41
