# Supplementary material for: Human dynein–dynactin is a fast processive motor in living cells
Source: eLife. 2026 Mar 25;13:RP94963. doi: 10.7554/eLife.94963 (PMC13016606; doi:10.7554/eLife.94963)
Supplement: Figure 3—figure supplement 1—source data 1. [file elife-94963-fig3-figsupp1-data1.xlsx]

## Sheet: K560 velocityRL
			Velocity	Run Length
			0.6	1.43				Velocity	Run Length			0.1		Bin	Frequency
			0.45	1.17			AVG	0.744309	1.15483			0.2		0.1	0
			0.975	1.56			STDEV	0.152406	0.442694			0.3		0.2	0
			0.47	2.34			SEM	0.0174822	0.0571515			0.4		0.3	0
			0.49	1.56			N	76	60			0.5		0.4	0
			0.65	1.95								0.6		0.5	5
			0.57	0.91								0.7		0.6	10
			0.58	1.17								0.8		0.7	18
			0.58	1.04								0.9		0.8	14
			0.74	1.04								1		0.9	15
			0.87	1.56								1.1		1	10
			0.91	0.91								1.2		1.1	4
			0.78	0.65										1.2	0
			0.65	0.65										More	0
			0.65	0.65
			0.78	0.78
			0.61	1.82
			0.59	1.17
			0.94	1.69
			0.91	0.91
			0.87	1.04
			0.8	1.43
			0.78	0.78
			0.49	0.78
			0.81	1.3
			0.975	1.17
			0.975	1.17
			0.76	0.91
			0.975	0.39
			0.8125	0.65
			0.65
			0.585	1.17
			1.04	1.04
			0.58	1.04
			0.59	1.17
			0.47	1.04
			0.65	0.52
			0.87	1.56
			0.87	1.04
			0.65	1.17
			0.74	1.04
			0.65	1.3
			0.74	1.04
			0.91
			0.74	1.04
			0.91	0.91
			0.65	1.82
			0.87
			0.65	1.04
			0.71	1.56
			0.81	0.65
			0.81	0.65
			0.74	1.04
			0.81	0.65
			0.58	1.04
			0.65	1.04
			0.87	1.04
			0.93	1.3
			0.76	0.91
			0.65
			0.87
			0.76
			0.65
			0.73
			0.7
			0.73
			0.68	2.86
			0.61	1.95
			0.65	1.04
			1.08
			0.89
			0.65
			1.04
			1.02
			0.81
			0.52	1.04
			Velocity	Run Length
		AVG	0.744309	1.15483
		STDEV	0.152406	0.442694
		SEM	0.0174822	0.0571515
		N	76	60
