# Supplementary material for: Human dynein–dynactin is a fast processive motor in living cells
Source: eLife. 2026 Mar 25;13:RP94963. doi: 10.7554/eLife.94963 (PMC13016606; doi:10.7554/eLife.94963)
Supplement: Figure 3—figure supplement 2—source data 1. [file elife-94963-fig3-figsupp2-data1.xlsx]

## Sheet: Kin1 Quant_S2 cells
		Area	Intensity	Background	Corrected Intensity	Plane				0	1000		1070.46		Bin	Frequency
Kin_01 _1	Small	144	46303	298.538	3313.6	24				1000			1144.59		0	0
	Large	224	70186							2000			1410.38		1000	0
										3000			1637.85		2000	5
		Area	Intensity	Background	Corrected Intensity	Plane				4000			1772.83		3000	22
Kin_01 _2	Small	100	30752	282.146	2537.42	20				5000			1931.04		4000	34
	Large	196	57838							6000			2029.18		5000	15
										7000			2037.17		6000	14
		Area	Intensity	Background	Corrected Intensity	Plane				8000			2092.12		7000	9
Kin_01 _3	Small	120	45771	326.067	6642.92	7							2169.96		8000	0
	Large	224	79682										2222.21		More	0
													2315.88
		Area	Intensity	Background	Corrected Intensity	Plane							2378.04
Kin_01 _4	Small	144	54342	334.25	6210	7							2378.96
	Large	256	91778										2381.88
													2408.88
		Area	Intensity	Background	Corrected Intensity	Plane							2466.75
Kin_01 _5	Small	100	41505	359.521	5552.92	3							2479.29
	Large	196	76019										2483.92
													2488.29
		Area	Intensity	Background	Corrected Intensity	Plane							2503
Kin_01 _6	Small	100	34952	331.792	1772.83	17							2525.62
	Large	196	66804										2537.42
													2564.04
		Area	Intensity	Background	Corrected Intensity	Plane							2631.38
Kin_01 _7	Small	100	34211	337.515	459.529	17							2817.76
	Large	168	57162										2917.08
													2922.17
		Area	Intensity	Background	Corrected Intensity	Plane							3066
Kin_01 _8	Small	100	38354	338.353	4518.71	17							3076.17
	Large	168	61362										3082.21
													3107.33
		Area	Intensity	Background	Corrected Intensity	Plane							3133.23
Kin_01 _9	Small	120	36827	286.192	2483.92	47							3133.5
	Large	224	66591										3144.88
													3146
		Area	Intensity	Background	Corrected Intensity	Plane							3222.35
Kin_01 _10	Small	144	56903	358	5351	12							3224.38
	Large	256	96999										3283.46
													3283.46
		Area	Intensity	Background	Corrected Intensity	Plane							3290.71
Kin_02_1	Small	100	28174	270.294	1144.59	34							3296.25
	Large	168	46554										3305.62
													3313.6
		Area	Intensity	Background	Corrected Intensity	Plane							3331.38
Kin_02_2	Small	100	28742	265.198	2222.21	34							3372.42
	Large	196	54201										3524.71
													3530.42
		Area	Intensity	Background	Corrected Intensity	Plane							3543.76
Kin_02_3	Small	100	33367	285.146	4852.42	34							3545.62
	Large	196	60741										3547.29
													3571.46
		Area	Intensity	Background	Corrected Intensity	Plane							3577.12
Kin_02_4	Small	100	30522	274.458	3076.17	34							3619.54
	Large	196	56870										3686.83
													3688.21
		Area	Intensity	Background	Corrected Intensity	Plane							3776.23
Kin_02_5	Small	120	38981	298.625	3146	22							3797.62
	Large	224	70038										3840.29
													3853.25
		Area	Intensity	Background	Corrected Intensity	Plane							3874.92
Kin_02_6	Small	100	33515	302.188	3296.25	22							3898.46
	Large	196	62525										4040.5
													4154.92
		Area	Intensity	Background	Corrected Intensity	Plane							4209.82
Kin_02_7	Small	100	33648	303.573	3290.71	22							4224.85
	Large	196	62791										4301.83
													4317.67
		Area	Intensity	Background	Corrected Intensity	Plane							4317.67
Kin_02_8	Small	120	39479	304.683	2917.08	22							4363.54
	Large	224	71166										4434.25
													4518.71
		Area	Intensity	Background	Corrected Intensity	Plane							4607.15
Kin_02_9	Small	100	36316	332.5	3066	28							4621.23
	Large	196	68236										4795
													4852.42
		Area	Intensity	Background	Corrected Intensity	Plane							4912.46
Kin_02_10	Small	100	34453	304.125	4040.5	47							5022.92
	Large	196	63649										5043.38
													5104.33
		Area	Intensity	Background	Corrected Intensity	Plane							5125.29
Kin_02_11	Small	100	32063	294.99	2564.04	47							5211.62
	Large	196	60382										5233.15
													5308.12
		Area	Intensity	Background	Corrected Intensity	Plane							5351
Kin_03 _1	Small	144	53729	326.762	6675.2	25							5493.29
	Large	224	79870										5552.92
													5564.92
		Area	Intensity	Background	Corrected Intensity	Plane							5840.67
Kin_03 _2	Small	120	40210	307.721	3283.46	25							5845.46
	Large	224	72213										5853.29
													6020.79
Kin_03 _3		Area	Intensity	Background	Corrected Intensity	Plane							6210
	Small	120	40210	307.721	3283.46	25							6251.79
	Large	224	72213										6379.46
													6642.92
Kin_03 _4		Area	Intensity	Background	Corrected Intensity	Plane							6658.47
	Small	144	46737	299.929	3547.29	25							6675.2
	Large	256	80329										6688.58
													6925.57
Kin_03 _5		Area	Intensity	Background	Corrected Intensity	Plane
	Small	100	36131	333.132	2817.76	25						AVG	3800.82
	Large	168	58784									STDEV	1390.05
												SEM	139.005
Kin_03 _6		Area	Intensity	Background	Corrected Intensity	Plane						N	100
	Small	144	57919	344.491	8312.29	25
	Large	256	96502
Kin_03 _7		Area	Intensity	Background	Corrected Intensity	Plane
	Small	120	44376	333.819	4317.67	25
	Large	192	68411
Kin_03 _8		Area	Intensity	Background	Corrected Intensity	Plane
	Small	120	44376	333.819	4317.67	25
	Large	192	68411
Kin_03 _9		Area	Intensity	Background	Corrected Intensity	Plane
	Small	120	43272	316.99	5233.15	20
	Large	224	76239
Kin_03 _10		Area	Intensity	Background	Corrected Intensity	Plane
	Small	100	30811	287.818	2029.18	38
	Large	144	43475
Kin_03 _11		Area	Intensity	Background	Corrected Intensity	Plane
	Small	100	38400	340.365	4363.54	13
	Large	196	71075
Kin_04 _1		Area	Intensity	Background	Corrected Intensity	Plane
	Small	100	34878	306.682	4209.82	21
	Large	144	48372
Kin_04 _2		Area	Intensity	Background	Corrected Intensity	Plane
	Small	100	36068	309.427	5125.29	21
	Large	196	65773
Kin_04 _3		Area	Intensity	Background	Corrected Intensity	Plane
	Small	120	47551	343.096	6379.46	21
	Large	224	83233
Kin_04 _4		Area	Intensity	Background	Corrected Intensity	Plane
	Small	120	42397	314.798	4621.23	21
	Large	224	75136
Kin_04 _5		Area	Intensity	Background	Corrected Intensity	Plane
	Small	100	32296	301.26	2169.96	35
	Large	196	61217
Kin_04 _6		Area	Intensity	Background	Corrected Intensity	Plane
	Small	120	39496	301.587	3305.62	35
	Large	224	70861
Kin_04 _7		Area	Intensity	Background	Corrected Intensity	Plane
	Small	100	32258	302.208	2037.17	35
	Large	196	61270
Kin_04 _8		Area	Intensity	Background	Corrected Intensity	Plane
	Small	100	31085	285.594	2525.62	35
	Large	196	58502
Kin_04 _9		Area	Intensity	Background	Corrected Intensity	Plane
	Small	100	34283	305.948	3688.21	46
	Large	196	63654
Kin_04 _10		Area	Intensity	Background	Corrected Intensity	Plane
	Small	100	32680	291.344	3545.62	46
	Large	196	60649
Kin_05_1		Area	Intensity	Background	Corrected Intensity	Plane
	Small	100	34581	302.792	4301.83	37
	Large	196	63649
Kin_05_2		Area	Intensity	Background	Corrected Intensity	Plane
	Small	100	31255	288.76	2378.96	37
	Large	196	58976
Kin_05_3		Area	Intensity	Background	Corrected Intensity	Plane
	Small	100	35201	302.885	4912.46	37
	Large	196	64278
Kin_05_4		Area	Intensity	Background	Corrected Intensity	Plane
	Small	100	34258	304.177	3840.29	37
	Large	196	63459
Kin_05_5		Area	Intensity	Background	Corrected Intensity	Plane
	Small	100	32215	289.926	3222.35	37
	Large	168	51930
Kin_05_6		Area	Intensity	Background	Corrected Intensity	Plane
	Small	100	34032	304.882	3543.76	37
	Large	168	54764
Kin_05_7		Area	Intensity	Background	Corrected Intensity	Plane
	Small	100	38307	347.823	3524.71	33
	Large	196	71698
Kin_05_8		Area	Intensity	Background	Corrected Intensity	Plane
	Small	100	38197	348.656	3331.38	33
	Large	196	71668
Kin_05_9		Area	Intensity	Background	Corrected Intensity	Plane
	Small	120	42131	315.885	4224.85	41
	Large	224	74983
Kin_05_10		Area	Intensity	Background	Corrected Intensity	Plane
	Small	100	33277	308.99	2378.04	41
	Large	196	62940
Kin_06_1		Area	Intensity	Background	Corrected Intensity	Plane
	Small	100	34210	318.281	2381.88	20
	Large	196	64765
Kin_06_2		Area	Intensity	Background	Corrected Intensity	Plane
	Small	100	41882	352.235	6658.47	20
	Large	168	65834
Kin_06_3		Area	Intensity	Background	Corrected Intensity	Plane
	Small	144	54443	329.982	6925.57	20
	Large	256	91401
Kin_06_4		Area	Intensity	Background	Corrected Intensity	Plane
	Small	100	45999	393.104	6688.58	20
	Large	196	83737
Kin_06_5		Area	Intensity	Background	Corrected Intensity	Plane
	Small	100	44671	415.375	3133.5	20
	Large	196	84547
Kin_06_6		Area	Intensity	Background	Corrected Intensity	Plane
	Small	100	37765	345.406	3224.38	13
	Large	196	70924
Kin_06_7		Area	Intensity	Background	Corrected Intensity	Plane
	Small	100	34643	317.208	2922.17	13
	Large	196	65095
Kin_06_8		Area	Intensity	Background	Corrected Intensity	Plane
	Small	120	44476	332.24	4607.15	13
	Large	224	79029
Kin_06_9		Area	Intensity	Background	Corrected Intensity	Plane
	Small	100	37577	337.021	3874.92	13
	Large	196	69931
Kin_06_10		Area	Intensity	Background	Corrected Intensity	Plane
	Small	100	42091	384.042	3686.83	13
	Large	196	78959
Kin_07_1		Area	Intensity	Background	Corrected Intensity	Plane
	Small	120	37742	283.048	3776.23	54
	Large	224	67179
Kin_07_2		Area	Intensity	Background	Corrected Intensity	Plane
	Small	100	29323	268.562	2466.75	54
	Large	196	55105
Kin_07_3		Area	Intensity	Background	Corrected Intensity	Plane
	Small	100	34871	296.594	5211.62	54
	Large	196	63344
Kin_07_4		Area	Intensity	Background	Corrected Intensity	Plane
	Small	100	28719	264.031	2315.88	55
	Large	196	54066
Kin_07_5		Area	Intensity	Background	Corrected Intensity	Plane
	Small	100	29912	275.031	2408.88	55
	Large	196	56315
Kin_07_6		Area	Intensity	Background	Corrected Intensity	Plane
	Small	100	32897	304.177	2479.29	55
	Large	196	62098
Kin_07_7		Area	Intensity	Background	Corrected Intensity	Plane
	Small	120	41170	303.125	4795	55
	Large	224	72695
Kin_07_8		Area	Intensity	Background	Corrected Intensity	Plane
	Small	120	41903	302.817	5564.92	55
	Large	224	73396
Kin_07_9		Area	Intensity	Background	Corrected Intensity	Plane
	Small	100	31678	291.75	2503	55
	Large	196	59686
Kin_07_10		Area	Intensity	Background	Corrected Intensity	Plane
	Small	100	36430	311.219	5308.12	55
	Large	196	66307
Kin_08_1		Area	Intensity	Background	Corrected Intensity	Plane
	Small	120	39859	318.51	1637.85	36
	Large	224	72984
Kin_08_2		Area	Intensity	Background	Corrected Intensity	Plane
	Small	100	32376	309.656	1410.38	36
	Large	196	62103
Kin_08_3		Area	Intensity	Background	Corrected Intensity	Plane
	Small	100	34397	305.438	3853.25	36
	Large	196	63719
Kin_08_4		Area	Intensity	Background	Corrected Intensity	Plane
	Small	100	33589	314.969	2092.12	36
	Large	196	63826
Kin_08_5		Area	Intensity	Background	Corrected Intensity	Plane
	Small	100	35557	314.021	4154.92	36
	Large	196	65703
Kin_08_6		Area	Intensity	Background	Corrected Intensity	Plane
	Small	100	40459	393.885	1070.46	5
	Large	196	78272
Kin_08_7		Area	Intensity	Background	Corrected Intensity	Plane
	Small	100	42656	401.677	2488.29	5
	Large	196	81217
Kin_08_8		Area	Intensity	Background	Corrected Intensity	Plane
	Small	100	44820	412.896	3530.42	5
	Large	196	84458
Kin_08_9		Area	Intensity	Background	Corrected Intensity	Plane
	Small	100	47874	420.333	5840.67	5
	Large	196	88226
Kin_08_10		Area	Intensity	Background	Corrected Intensity	Plane
	Small	100	43156	395.365	3619.54	5
	Large	196	81111
Kin_09_1		Area	Intensity	Background	Corrected Intensity	Plane
	Small	100	40487	371.146	3372.42	5
	Large	196	76117
Kin_09_2		Area	Intensity	Background	Corrected Intensity	Plane
	Small	100	39524	364.167	3107.33	5
	Large	196	74484
Kin_09_3		Area	Intensity	Background	Corrected Intensity	Plane
	Small	100	47125	421.021	5022.92	5
	Large	196	87543
Kin_09_4		Area	Intensity	Background	Corrected Intensity	Plane
	Small	100	44528	400.938	4434.25	5
	Large	196	83018
Kin_09_5		Area	Intensity	Background	Corrected Intensity	Plane
	Small	100	35732	319.344	3797.62	15
	Large	196	66389
Kin_09_6		Area	Intensity	Background	Corrected Intensity	Plane
	Small	100	33555	316.24	1931.04	15
	Large	196	63914
Kin_09_7		Area	Intensity	Background	Corrected Intensity	Plane
	Small	100	34923	317.781	3144.88	15
	Large	196	65430
Kin_09_8		Area	Intensity	Background	Corrected Intensity	Plane
	Small	100	35537	316.385	3898.46	15
	Large	196	65910
Kin_09_9		Area	Intensity	Background	Corrected Intensity	Plane
	Small	120	42409	327.298	3133.23	15
	Large	224	76448
Kin_09_10		Area	Intensity	Background	Corrected Intensity	Plane
	Small	100	35272	326.406	2631.38	15
	Large	196	66607
Kin_10_1		Area	Intensity	Background	Corrected Intensity	Plane
	Small	100	50976	449.552	6020.79	3
	Large	196	94133
Kin_10_2		Area	Intensity	Background	Corrected Intensity	Plane
	Small	100	47574	439.969	3577.12	3
	Large	196	89811
Kin_10_3		Area	Intensity	Background	Corrected Intensity	Plane
	Small	100	51646	457.927	5853.29	3
	Large	196	95607
Kin_10_4		Area	Intensity	Background	Corrected Intensity	Plane
	Small	100	47977	448.948	3082.21	3
	Large	196	91076
Kin_10_5		Area	Intensity	Background	Corrected Intensity	Plane
	Small	120	59587	447.846	5845.46	3
	Large	224	106163
Kin_10_6		Area	Intensity	Background	Corrected Intensity	Plane
	Small	100	47421	423.167	5104.33	25
	Large	196	88045
Kin_10_7		Area	Intensity	Background	Corrected Intensity	Plane
	Small	100	48485	449.135	3571.46	25
	Large	196	91602
Kin_10_8		Area	Intensity	Background	Corrected Intensity	Plane
	Small	100	49684	446.406	5043.38	25
	Large	196	92539
Kin_10_9		Area	Intensity	Background	Corrected Intensity	Plane
	Small	100	50832	445.802	6251.79	21
	Large	196	93629
Kin_10_10		Area	Intensity	Background	Corrected Intensity	Plane
	Small	100	51161	456.677	5493.29	25
	Large	196	95002

## Sheet: DHC Quant
Cell	x,y	plane			Area	Total Intensity	Background Signal	Corrected Intensity			981.286
DHC_01_1	398153	32		Small	100	33525	302.917	3233.33			1006.96
				Big	196	62605					1209.88
											1475.5
Cell	x,y	plane			Area	Total Intensity	Background Signal	Corrected Intensity			1562.08
DHC_01_2	320256	9		Small	120	49784	378.778	4330.67			1592.96
				Big	192	77056					1684.04
											1709
Cell	x,y	plane			Area	Total Intensity	Background Signal	Corrected Intensity			1857.09
DHC_01_3 (nice kymo)	348297	24		Small	120	39343	303.962	2867.62			1943.88
				Big	224	70955					2017.79
											2062.96
Cell	x,y	plane			Area	Total Intensity	Background Signal	Corrected Intensity			2068.17
DHC_02_1	356185	25		Small	144	43190	293.116	981.286			2079.25
				Big	256	76019					2170.75
											2182.96
Cell	x,y	plane			Area	Total Intensity	Background Signal	Corrected Intensity			2187.41
DHC_02_5 (Nice slower kymo)	242283	7		Small	100	41042	367.438	4298.25			2226.71
				Big	196	76316					2249.31
											2301.21
Cell	x,y	plane			Area	Total Intensity	Background Signal	Corrected Intensity			2375.77
DHC_04_1	369243	22		Small	120	48450	352.548	6144.23			2422.23
				Big	224	85115					2573.38
											2718.58
Cell	x,y	plane			Area	Total Intensity	Background Signal	Corrected Intensity			2742.42
DHC_04_2	350251	28		Small	100	33723	300.542	3668.83			2848.75
				Big	196	62575					2867.62
											2871.54
Cell	x,y	plane			Area	Total Intensity	Background Signal	Corrected Intensity			2945.77
DHC_04_3 (perfect kymo)	339239	40		Small	120	38608	301.548	2422.23			3008.79
				Big	224	69969					3096.71
											3098.54
Cell	x,y	plane			Area	Total Intensity	Background Signal	Corrected Intensity			3183.33
DHC_04_4	304255	40		Small	120	40212	316.356	2249.31			3194.5
				Big	224	73113					3233.33
											3356.46
Cell	x,y	plane			Area	Total Intensity	Background Signal	Corrected Intensity			3357.79
DHC_04_5	314254	52		Small	100	33474	297.542	3719.83			3439.58
				Big	196	62038					3506.58
											3523.82
Cell	x,y	plane			Area	Total Intensity	Background Signal	Corrected Intensity			3602.69
DHC_04_7	70117	29		Small	100	39218	335.719	5646.12			3668.83
				Big	196	71447					3719.83
											3730.92
Cell	x,y	plane			Area	Total Intensity	Background Signal	Corrected Intensity			3746.83
DHC_04_8	304255	32		Small	120	42905	327.519	3602.69			3754.88
				Big	224	76967					3783.46
											3825.17
Cell	x,y	plane			Area	Total Intensity	Background Signal	Corrected Intensity			4010.17
DHC_04_9	252259	50		Small	100	34213	308.552	3357.79			4093.88
				Big	196	63834					4182.88
											4197.54
Cell	x,y	plane			Area	Total Intensity	Background Signal	Corrected Intensity			4281.83
DHC_04_10	223286	53		Small	120	42300	327.952	2945.77			4298.25
				Big	224	76407					4330.67
											4426.86
Cell	x,y	plane			Area	Total Intensity	Background Signal	Corrected Intensity			4682
DHC_04_11	228283	19		Small	120	52516	381.625	6721			4767.31
				Big	224	92205					5137.25
											5265.38
Cell	x,y	plane			Area	Total Intensity	Background Signal	Corrected Intensity			5269.57
DHC_06_01	229161	35		Small	144	44111	273.812	4682			5516.5
				Big	256	74778					5646.12
											6090.57
Cell	x,y	plane			Area	Total Intensity	Background Signal	Corrected Intensity			6144.23
DHC_06_02	236157	41		Small	100	28810	272.479	1562.08			6215.33
				Big	196	54968					6336.79
											6437.62
Cell	x,y	plane			Area	Total Intensity	Background Signal	Corrected Intensity			6721
DHC_06_03	271178	28		Small	144	50467	308.17	6090.57			6981.04
				Big	256	84982					9320.04
Cell	x,y	plane			Area	Total Intensity	Background Signal	Corrected Intensity
DHC_06_04	266183	8		Small	100	40814	382.406	2573.38		AVG	3536.9
				Big	196	77525				STDEV	1627.49
										SEM	193.147
Cell	x,y	plane			Area	Total Intensity	Background Signal	Corrected Intensity		N	71
DHC_06_05	305169	39		Small	120	38850	292.221	3783.46
				Big	224	69241
Cell	x,y	plane			Area	Total Intensity	Background Signal	Corrected Intensity
DHC_06_06	295117	18		Small	100	43819	344.99	9320.04
				Big	196	76938
Cell	x,y	plane			Area	Total Intensity	Background Signal	Corrected Intensity
DHC_06_07	177296	12		Small	100	40654	351.375	5516.5
				Big	196	74386
Cell	x,y	plane			Area	Total Intensity	Background Signal	Corrected Intensity
DHC_06_08	83205	32		Small	100	34047	299.531	4093.88
				Big	196	62802
Cell	x,y	plane			Area	Total Intensity	Background Signal	Corrected Intensity
DHC_07_01	195177	31		Small	100	29858	288.51	1006.96
				Big	196	57555
Cell	x,y	plane			Area	Total Intensity	Background Signal	Corrected Intensity
DHC_07_02	179169	6		Small	100	41975	387.917	3183.33
				Big	196	79215
Cell	x,y	plane			Area	Total Intensity	Background Signal	Corrected Intensity
DHC_07_03	187168	6		Small	100	38259	365.5	1709
				Big	196	73347
Cell	x,y	plane			Area	Total Intensity	Background Signal	Corrected Intensity
DHC_07_04	165201	54		Small	100	28598	265.188	2079.25
				Big	196	54056
Cell	x,y	plane			Area	Total Intensity	Background Signal	Corrected Intensity
DHC_07_05	320376	44		Small	100	32384	302.01	2182.96
				Big	196	61377
Cell	x,y	plane			Area	Total Intensity	Background Signal	Corrected Intensity
DHC_07_06	378378	5		Small	120	54415	413.731	4767.31
				Big	224	97443
Cell	x,y	plane			Area	Total Intensity	Background Signal	Corrected Intensity
DHC_07_07	281314	46		Small	100	36456	313.188	5137.25
				Big	196	66522
Cell	x,y	plane			Area	Total Intensity	Background Signal	Corrected Intensity
DHC_07_08	161309	36		Small	100	30883	291.99	1684.04
				Big	196	58914
Cell	x,y	plane			Area	Total Intensity	Background Signal	Corrected Intensity
DHC_07_09	159309	49		Small	100	32031	280.208	4010.17
				Big	196	58931
Cell	x,y	plane			Area	Total Intensity	Background Signal	Corrected Intensity
DHC_07_10	155304	52		Small	100	30739	286.708	2068.17
				Big	196	58263
Cell	x,y	plane			Area	Total Intensity	Background Signal	Corrected Intensity
DHC_07_11	192307	24		Small	100	35121	312.958	3825.17
				Big	196	65165
Cell	x,y	plane			Area	Total Intensity	Background Signal	Corrected Intensity
DHC_07_12	193310	46		Small	100	32702	305.312	2170.75
				Big	196	62012
Cell	x,y	plane			Area	Total Intensity	Background Signal	Corrected Intensity
DHC_07_13	267279	21		Small	100	37064	340.552	3008.79
				Big	196	69757
Cell	x,y	plane			Area	Total Intensity	Background Signal	Corrected Intensity
DHC_07_14	238218	40		Small	100	33233	295.021	3730.92
				Big	196	61555
Cell	x,y	plane			Area	Total Intensity	Background Signal	Corrected Intensity
DHC_07_15	260191	16		Small	100	36955	341.062	2848.75
				Big	196	69697
Cell	x,y	plane			Area	Total Intensity	Background Signal	Corrected Intensity
DHC_07_16	251169	8		Small	100	39110	360.115	3098.54
				Big	196	73681
Cell	x,y	plane			Area	Total Intensity	Background Signal	Corrected Intensity
DHC_09_01	322177	28		Small	100	42911	387.281	4182.88
				Big	196	80090
Cell	x,y	plane			Area	Total Intensity	Background Signal	Corrected Intensity
DHC_09_02	366179	39		Small	100	43955	369.74	6981.04
				Big	196	79450
Cell	x,y	plane			Area	Total Intensity	Background Signal	Corrected Intensity
DHC_09_03	380226	18		Small	100	38833	350.781	3754.88
				Big	196	72508
Cell	x,y	plane			Area	Total Intensity	Background Signal	Corrected Intensity
DHC_09_04	381227	24		Small	100	38757	325.417	6215.33
				Big	196	69997
Cell	x,y	plane			Area	Total Intensity	Background Signal	Corrected Intensity
DHC_09_06	304244	49		Small	100	33567	300.604	3506.58	Ideal example
				Big	196	62425
Cell	x,y	plane			Area	Total Intensity	Background Signal	Corrected Intensity
DHC_09_07	282263	53		Small	100	35567	292.302	6336.79	fast
				Big	196	63628
Cell	x,y	plane			Area	Total Intensity	Background Signal	Corrected Intensity
DHC_09_08	322259	33		Small	100	38470	351.135	3356.46
				Big	196	72179
Cell	x,y	plane			Area	Total Intensity	Background Signal	Corrected Intensity
DHC_09_09	323325	13		Small	100	40550	371.104	3439.58
				Big	196	76176
Cell	x,y	plane			Area	Total Intensity	Background Signal	Corrected Intensity
DHC_09_11	343322	21		Small	100	36711	324.292	4281.83
				Big	196	67843
Cell	x,y	plane			Area	Total Intensity	Background Signal	Corrected Intensity
DHC_10_04	229131	41		Small	100	27172	252.281	1943.88
				Big	196	51391
Cell	x,y	plane			Area	Total Intensity	Background Signal	Corrected Intensity
DHC_10_07	295,48	36		Small	100	26569	249.76	1592.96
				Big	196	50546
Cell	x,y	plane			Area	Total Intensity	Background Signal	Corrected Intensity
DHC_10_08	315,63	5		Small	144	49322	305.92	5269.57
				Big	256	83585
Cell	x,y	plane			Area	Total Intensity	Background Signal	Corrected Intensity
DHC_10_09	384141	17		Small	100	37309	331.115	4197.54
				Big	196	69096
Cell	x,y	plane			Area	Total Intensity	Background Signal	Corrected Intensity
DHC_10_10	342153	17		Small	100	32823	308.052	2017.79
				Big	196	62396
Cell	x,y	plane			Area	Total Intensity	Background Signal	Corrected Intensity
DHC_10_11	389152	16		Small	100	31188	297.125	1475.5
				Big	196	59712
Cell	x,y	plane			Area	Total Intensity	Background Signal	Corrected Intensity
DHC_10_12	414180	20		Small	100	31026	272.792	3746.83
				Big	196	57214
Cell	x,y	plane			Area	Total Intensity	Background Signal	Corrected Intensity
DHC_10_13	431223	31		Small	100	27383	245.115	2871.54
				Big	196	50914
Cell	x,y	plane			Area	Total Intensity	Background Signal	Corrected Intensity
DHC_10_14	367209	17		Small	100	30632	278.896	2742.42
				Big	196	57406
Cell	x,y	plane			Area	Total Intensity	Background Signal	Corrected Intensity
DHC_11_01	371,77	19		Small	100	28264	262.01	2062.96
				Big	196	53417
Cell	x,y	plane			Area	Total Intensity	Background Signal	Corrected Intensity
DHC_11_02	383,94	47		Small	144	38675	247.071	3096.71
				Big	256	66347
Cell	x,y	plane			Area	Total Intensity	Background Signal	Corrected Intensity
DHC_11_03	394288	21		Small	120	32400	250.202	2375.77
				Big	224	58421
Cell	x,y	plane			Area	Total Intensity	Background Signal	Corrected Intensity
DHC_11_04	390297	26		Small	100	26758	245.706	2187.41
				Big	168	43466
Cell	x,y	plane			Area	Total Intensity	Background Signal	Corrected Intensity
DHC_11_05	369303	33		Small	100	25173	233.159	1857.09
				Big	144	35432
Cell	x,y	plane			Area	Total Intensity	Background Signal	Corrected Intensity
DHC_11_06	344236	38		Small	100	28657	254.625	3194.5
				Big	196	53101
Cell	x,y	plane			Area	Total Intensity	Background Signal	Corrected Intensity
DHC_11_07	337234	12		Small	100	29934	277.073	2226.71
				Big	196	56533
Cell	x,y	plane			Area	Total Intensity	Background Signal	Corrected Intensity
DHC_11_08	291285	28		Small	100	28567	250.432	3523.82
				Big	144	39586
										100
Cell	x,y	plane			Area	Total Intensity	Background Signal	Corrected Intensity		196
DHC_11_09	313322	3		Small	144	46021	288.848	4426.86
				Big	256	78372
Cell	x,y	plane			Area	Total Intensity	Background Signal	Corrected Intensity
DHC_11_10	320312	8		Small	100	28738	275.281	1209.88
				Big	196	55165
Cell	x,y	plane			Area	Total Intensity	Background Signal	Corrected Intensity
DHC_11_11	336303	32		Small	100	26179	234.604	2718.58
				Big	196	48701
Cell	x,y	plane			Area	Total Intensity	Background Signal	Corrected Intensity
DHC_11_12	277258	38		Small	100	28571	262.698	2301.21
				Big	196	53790
Cell	x,y	plane			Area	Total Intensity	Background Signal	Corrected Intensity
DHC_11_13	301298	8		Small	144	46934	289.365	5265.38	New one
				Big	196	61981
Cell	x,y	plane			Area	Total Intensity	Background Signal	Corrected Intensity
DHC_11_14	295302	31		Small	100	32697	262.594	6437.62	New one
				Big	196	57906

## Sheet: p50 Quant
Cell	x,y	quant plane	movement planes			Area	Total Intensity	Background Signal	Corrected Intensity			1070.46	999.625		0		Bin	Frequency
p50_01	275390	28	26-36		Small	100	33316	304.646	2851.42			1144.59	1143.04		100		0	0
					Big	196	62562					1410.38	1230.96		2000		100	0
												1637.85	1263.33		3000		2000	6
Cell	x,y	plane	movement planes			Area	Total Intensity	Background Signal	Corrected Intensity			1772.83	1306.38		4000		3000	22
p50_03	315304	3	1-8		Small	196	70573	341.828	3574.69			1931.04	1495.04		5000		4000	34
					Big	324	114327					2029.18	1530.79		6000		5000	15
												2037.17	1704.92		7000		6000	14
Cell	x,y	plane	movement planes			Area	Total Intensity	Background Signal	Corrected Intensity			2092.12	1719.25		8000		7000	9
p50_04_1	367256	20	12-21		Small	100	32165	298.24	2341.04			2169.96	1720.46				8000	0
					Big	196	60796					2222.21	1741.83				More	0
												2315.88	1813.25
Cell	x,y	plane	movement planes			Area	Total Intensity	Background Signal	Corrected Intensity			2378.04	1858.21					100
p50_04_2	348342	19	17-24		Small	120	37595	291	2675			2378.96	1873.29
					Big	224	67859					2381.88	1909.46
												2408.88	1965
Cell	x,y	plane	movement planes			Area	Total Intensity	Background Signal	Corrected Intensity			2466.75	2034.25
p50_04_3	360234	47	40-46		Small	100	29005	262.562	2748.75			2479.29	2071
					Big	196	54211					2483.92	2098
												2488.29	2105.92
Cell	x,y	plane	movement planes			Area	Total Intensity	Background Signal	Corrected Intensity			2503	2129.92
p50_04_4	219225	45	37-50		Small	100	29015	270.5	1965			2525.62	2131.29
					Big	196	54983					2537.42	2235.38
												2564.04	2341.04
Cell	x,y	plane	movement planes			Area	Total Intensity	Background Signal	Corrected Intensity			2631.38	2350.83
p50_04_5	282232	20	11-23		Small	100	31316	294.427	1873.29			2817.76	2576.08
					Big	196	59581					2917.08	2645.5
												2922.17	2675
Cell	x,y	plane	movement planes			Area	Total Intensity	Background Signal	Corrected Intensity			3066	2748.75
p50_05_01	80124	55	54-59		Small	100	27617	264.74	1143.04			3076.17	2760.86
					Big	196	53032					3082.21	2769.08
												3107.33	2839.75
Cell	x,y	plane	movement planes			Area	Total Intensity	Background Signal	Corrected Intensity			3133.23	2839.75
p50_05_02	106123	43	42-52		Small	100	28207	269.76	1230.96			3133.5	2851.42
					Big	196	54104					3144.88	3034.29
												3146	3070.92
Cell	x,y	plane	movement planes			Area	Total Intensity	Background Signal	Corrected Intensity			3222.35	3138.92
p50_06_01	310258	34	16-35		Small	100	28230	258.792	2350.83			3224.38	3574.69
					Big	196	53074					3283.46
												3283.46
Cell	x,y	plane	movement planes			Area	Total Intensity	Background Signal	Corrected Intensity			3290.71
p50_06_02	310283	43	38-45		Small	100	27048	251.385	1909.46			3296.25
					Big	196	51181					3305.62
												3313.6
Cell	x,y	plane	movement planes			Area	Total Intensity	Background Signal	Corrected Intensity			3331.38
p50_06_03	312282	29	29-35		Small	100	27530	262.667	1263.33			3372.42
					Big	196	52746					3524.71
												3530.42
Cell	x,y	plane	movement planes			Area	Total Intensity	Background Signal	Corrected Intensity			3543.76
p50_06_04	268239	18	14-18		Small	100	30634	289.135	1720.46			3545.62
					Big	196	58391					3547.29
												3571.46
Cell	x,y	plane	movement planes			Area	Total Intensity	Background Signal	Corrected Intensity			3577.12
p50_06_05	264240	55	49-59		Small	100	26412	245.988	1813.25			3619.54
					Big	180	46091					3686.83
												3688.21
Cell	x,y	plane	movement planes			Area	Total Intensity	Background Signal	Corrected Intensity			3776.23
p50_06_06	10337	24	24-34		Small	100	29874	277.427	2131.29			3797.62
					Big	196	56507					3840.29
												3853.25
Cell	x,y	plane	movement planes			Area	Total Intensity	Background Signal	Corrected Intensity			3874.92
p50_06_07	30340	10	10-20		Small	120	40306	312.808	2769.08			3898.46
					Big	224	72838					4040.5
												4154.92
Cell	x,y	plane	movement planes			Area	Total Intensity	Background Signal	Corrected Intensity			4209.82
p50_06_08	63444	55	45-58		Small	100	24822	235.156	1306.38			4224.85
					Big	196	47397					4301.83
												4317.67
Cell	x,y	plane	movement planes			Area	Total Intensity	Background Signal	Corrected Intensity			4317.67
p50_07_01 (nice kymo)	317216	6	5-22		Small	100	34346	315.062	2839.75			4363.54
					Big	196	64592					4434.25
												4518.71
Cell	x,y	plane	movement planes			Area	Total Intensity	Background Signal	Corrected Intensity			4607.15
p50_07_02	239286	52	45-54		Small	100	27376	251.406	2235.38			4621.23
					Big	196	51511					4795
												4852.42
Cell	x,y	plane	movement planes			Area	Total Intensity	Background Signal	Corrected Intensity			4912.46
p50_07_03	287236	52	49-57		Small	100	26771	247	2071			5022.92
					Big	196	50483					5043.38
												5104.33
Cell	x,y	plane	movement planes			Area	Total Intensity	Background Signal	Corrected Intensity			5125.29
p50_07_04	234228	37	20-51		Small	100	27773	256.75	2098			5211.62
					Big	196	52421					5233.15
												5308.12
Cell	x,y	plane	movement planes			Area	Total Intensity	Background Signal	Corrected Intensity			5351
p50_07_05	297175	11	11-18		Small	100	32748	296.771	3070.92			5493.29
					Big	196	61238					5552.92
												5564.92
Cell	x,y	plane	movement planes			Area	Total Intensity	Background Signal	Corrected Intensity			5840.67
p50_07_06	298176	55	41-56		Small	100	26286	247.552	1530.79			5845.46
					Big	196	50051					5853.29
												6020.79
Cell	x,y	plane	movement planes			Area	Total Intensity	Background Signal	Corrected Intensity			6210
p50_07_07	334166	7	6-22		Small	100	33433	313.271	2105.92			6251.79
					Big	196	63507					6379.46
												6642.92
Cell	x,y	plane	movement planes			Area	Total Intensity	Background Signal	Corrected Intensity			6658.47
p50_07_08	317216	6	4-22		Small	100	34346	315.062	2839.75			6675.2
					Big	196	64592					6688.58
												6925.57
Cell	x,y	plane	movement planes			Area	Total Intensity	Background Signal	Corrected Intensity
p50_07_09	381278	1	1-9		Small	100	37177	341.427	3034.29
					Big	196	69954
Cell	x,y	plane	movement planes			Area	Total Intensity	Background Signal	Corrected Intensity
p50_07_10	384270	27	24-32		Small	100	26557	248.521	1704.92
					Big	196	50415
Cell	x,y	plane	movement planes			Area	Total Intensity	Background Signal	Corrected Intensity
p50_07_11	399255	26	1-13_pause_23-27		Small	100	28003	259.688	2034.25
					Big	196	52933
Cell	x,y	plane	movement planes			Area	Total Intensity	Background Signal	Corrected Intensity
p50_08_01	293218	23	16-31		Small	144	47865	313.223	2760.86
					Big	256	82946
Cell	x,y	plane	movement planes			Area	Total Intensity	Background Signal	Corrected Intensity
p50_09_01	272274	6	6-18		Small	100	40541	374.021	3138.92
					Big	196	76447
Cell	x,y	plane	movement planes			Area	Total Intensity	Background Signal	Corrected Intensity
p50_10_01	285398	35	36-46		Small	100	29044	275.49	1495.04
					Big	196	55491
Cell	x,y	plane	movement planes			Area	Total Intensity	Background Signal	Corrected Intensity
p50_10_02	268347	59	49-59		Small	100	26921	251.792	1741.83
					Big	196	51093
Cell	x,y	plane	movement planes			Area	Total Intensity	Background Signal	Corrected Intensity
p50_10_04	247288	36	29-38		Small	100	30938	292.188	1719.25
					Big	196	58988
Cell	x,y	plane	movement planes			Area	Total Intensity	Background Signal	Corrected Intensity
p50_10_05	134421	28	30-37		Small	100	30833	281.875	2645.5
					Big	196	57893
Cell	x,y	plane	movement planes			Area	Total Intensity	Background Signal	Corrected Intensity
p50_10_06	137303	25	21-25		Small	100	30834	298.344	999.625
					Big	196	59475
Cell	x,y	plane	movement planes			Area	Total Intensity	Background Signal	Corrected Intensity
p50_10_10	361100	56	44-57		Small	100	28003	261.448	1858.21
					Big	196	53102
Cell	x,y	plane	movement planes			Area	Total Intensity	Background Signal	Corrected Intensity
p50_10_12	370160	22	17-22		Small	100	31674	290.979	2576.08
					Big	196	59608
Cell	x,y	plane	movement planes			Area	Total Intensity	Background Signal	Corrected Intensity
p50_10_13	420170	60	52-58		Small	100	27232	251.021	2129.92
					Big	196	51330

## Sheet: Summary
	Fluoresence Intensity
	Kinesin	DHC	p50		0		Bin	Kinesin		Bin	DHC		Bin	p50
	1070.46	981.286	999.625		1000		0	0		0	0		0	0
	1144.59	1006.96	1143.04		2000		1000	0		1000	1.40845		1000	2.63158
	1410.38	1209.88	1230.96		3000		2000	6		2000	12.6761		2000	39.4737
	1637.85	1475.5	1263.33		4000		3000	22		3000	26.7606		3000	47.3684
	1772.83	1562.08	1306.38		5000		4000	34		4000	26.7606		4000	10.5263
	1931.04	1592.96	1495.04		6000		5000	15		5000	14.0845		5000	0
	2029.18	1684.04	1530.79		7000		6000	14		6000	7.04225		6000	0
	2037.17	1709	1704.92		8000		7000	9		7000	9.85915		7000	0
	2092.12	1857.09	1719.25				8000	0		8000	0		8000	0
	2169.96	1943.88	1720.46				More	0		More	1.40845		More	0
	2222.21	2017.79	1741.83
	2315.88	2062.96	1813.25					100			100			100
	2378.04	2068.17	1858.21
	2378.96	2079.25	1873.29
	2381.88	2170.75	1909.46		Bin	Kinesin	DHC	p50
	2408.88	2182.96	1965		0	0	0	0
	2466.75	2187.41	2034.25		1000	0	1.40845	2.63158
	2479.29	2226.71	2071		2000	6	12.6761	39.4737
	2483.92	2249.31	2098		3000	22	26.7606	47.3684
	2488.29	2301.21	2105.92		4000	34	26.7606	10.5263
	2503	2375.77	2129.92		5000	15	14.0845	0
	2525.62	2422.23	2131.29		6000	14	7.04225	0
	2537.42	2573.38	2235.38		7000	9	9.85915	0
	2564.04	2718.58	2341.04		8000	0	0	0
	2631.38	2742.42	2350.83		More	0	1.40845	0
	2817.76	2848.75	2576.08
	2917.08	2867.62	2645.5
	2922.17	2871.54	2675
	3066	2945.77	2748.75
	3076.17	3008.79	2760.86
	3082.21	3096.71	2769.08
	3107.33	3098.54	2839.75
	3133.23	3183.33	2839.75
	3133.5	3194.5	2851.42
	3144.88	3233.33	3034.29
	3146	3356.46	3070.92
	3222.35	3357.79	3138.92
	3224.38	3439.58	3574.69
	3283.46	3506.58
	3283.46	3523.82
	3290.71	3602.69
	3296.25	3668.83
	3305.62	3719.83
	3313.6	3730.92
	3331.38	3746.83
	3372.42	3754.88
	3524.71	3783.46
	3530.42	3825.17
	3543.76	4010.17
	3545.62	4093.88
	3547.29	4182.88
	3571.46	4197.54
	3577.12	4281.83
	3619.54	4298.25
	3686.83	4330.67
	3688.21	4426.86
	3776.23	4682
	3797.62	4767.31
	3840.29	5137.25
	3853.25	5265.38
	3874.92	5269.57
	3898.46	5516.5
	4040.5	5646.12
	4154.92	6090.57
	4209.82	6144.23
	4224.85	6215.33
	4301.83	6336.79
	4317.67	6437.62
	4317.67	6721
	4363.54	6981.04
	4434.25	9320.04
	4518.71
	4607.15
	4621.23
	4795
	4852.42
	4912.46
	5022.92
	5043.38
	5104.33
	5125.29
	5211.62
	5233.15
	5308.12
	5351
	5493.29
	5552.92
	5564.92
	5840.67
	5845.46
	5853.29
	6020.79
	6210
	6251.79
	6379.46
	6642.92
	6658.47
	6675.2
	6688.58
	6925.57
	Kinesin	DHC	p50
AVG	3800.82	3536.9	2165.72
STDEV	1390.05	1627.49	628.013
SEM	139.005	193.147	101.877
N	100	71	38

## Sheet: Summary with stats
	Fluoresence Intensity				Plots of differences summary
	Kinesin	DHC	p50
	1070.46	981.286	999.625		p-value ohigher than 0.05 for:
	1144.59	1006.96	1143.04		Intensities of Kinesin 1 vs DHC
	1410.38	1209.88	1230.96
	1637.85	1475.5	1263.33		p-value less than 0.001 for:
	1772.83	1562.08	1306.38		Intensities of Kinesin 1 vs p50
	1931.04	1592.96	1495.04		Intensities of DHC vs p50
	2029.18	1684.04	1530.79
	2037.17	1709	1704.92
	2092.12	1857.09	1719.25
	2169.96	1943.88	1720.46
	2222.21	2017.79	1741.83
	2315.88	2062.96	1813.25
	2378.04	2068.17	1858.21
	2378.96	2079.25	1873.29
	2381.88	2170.75	1909.46
	2408.88	2182.96	1965
	2466.75	2187.41	2034.25
	2479.29	2226.71	2071
	2483.92	2249.31	2098
	2488.29	2301.21	2105.92
	2503	2375.77	2129.92
	2525.62	2422.23	2131.29
	2537.42	2573.38	2235.38
	2564.04	2718.58	2341.04
	2631.38	2742.42	2350.83
	2817.76	2848.75	2576.08
	2917.08	2867.62	2645.5
	2922.17	2871.54	2675
	3066	2945.77	2748.75
	3076.17	3008.79	2760.86
	3082.21	3096.71	2769.08
	3107.33	3098.54	2839.75
	3133.23	3183.33	2839.75
	3133.5	3194.5	2851.42
	3144.88	3233.33	3034.29
	3146	3356.46	3070.92
	3222.35	3357.79	3138.92
	3224.38	3439.58	3574.69
	3283.46	3506.58
	3283.46	3523.82
	3290.71	3602.69
	3296.25	3668.83
	3305.62	3719.83
	3313.6	3730.92
	3331.38	3746.83
	3372.42	3754.88
	3524.71	3783.46
	3530.42	3825.17
	3543.76	4010.17
	3545.62	4093.88
	3547.29	4182.88
	3571.46	4197.54
	3577.12	4281.83
	3619.54	4298.25
	3686.83	4330.67
	3688.21	4426.86
	3776.23	4682
	3797.62	4767.31
	3840.29	5137.25
	3853.25	5265.38
	3874.92	5269.57
	3898.46	5516.5
	4040.5	5646.12
	4154.92	6090.57
	4209.82	6144.23
	4224.85	6215.33
	4301.83	6336.79
	4317.67	6437.62
	4317.67	6721
	4363.54	6981.04
	4434.25	9320.04
	4518.71
	4607.15
	4621.23
	4795
	4852.42
	4912.46
	5022.92
	5043.38
	5104.33
	5125.29
	5211.62
	5233.15
	5308.12
	5351
	5493.29
	5552.92
	5564.92
	5840.67
	5845.46
	5853.29
	6020.79
	6210
	6251.79
	6379.46
	6642.92
	6658.47
	6675.2
	6688.58
	6925.57
	Fluoresence Intensity
	Kinesin	DHC	p50
AVG	3800.82	3536.9	2165.72
STDEV	1390.05	1627.49	628.013
SEM	139.005	193.147	101.877
N	100	71	38
