# Supplementary material for: Human dynein–dynactin is a fast processive motor in living cells
Source: eLife. 2026 Mar 25;13:RP94963. doi: 10.7554/eLife.94963 (PMC13016606; doi:10.7554/eLife.94963)
Supplement: Figure 3—source data 5. [file elife-94963-fig3-data5.xlsx]

## Sheet: Motility summary
p50				DHC					Run time					Bin	p50	DHC
Run time (s)	Velocity um/sec	Run length (microns)		Run time (s)	Velocity um/sec	Run length (microns)				p50	DHC			0	0	0
2.2	1.89	4.158		2.2	0.98	2.156			Mean	2.22927	2.59753			0.5	0	7
1.6	1.11	1.776		1.4	2.1	2.94			Variance	1.03112	2.43949			1	38.6364	39
2	0.975	1.95		4	1.4	5.6			Observations	41	81			1.5	36.3636	30
1.6	2.06	3.296		2.8	1.63	4.564			Pooled Variance	1.97004				2	20.4545	17
1.4	0.79	1.106		2.2	1.02	2.244			Hypothesized Mean Difference	0				2.5	4.54545	6
2.8	1.81	5.068		2.4	1.6	3.84			df	120				3	0	1
2.6	1.71	4.446		0.8	1.5	1.2			t Stat	-1.36891				3.5	0	0
1.2	1.11	1.332		1.2	0.9	1.08			P(T<=t) one-tail	0.0867922				4	0	0
2.2	1.69	3.718		1.2	1.82	2.184			t Critical one-tail	1.65765				4.5	0	0
4	0.68	2.72		1.6	0.73	1.168			P(T<=t) two-tail	0.173584				5	0	0
1.6	1.19	1.904		3	0.975	2.925			t Critical two-tail	1.97993				More	0	0
1.4	1.95	2.73		2.2	1.14	2.508
1	0.98	0.98		2.8	1.1	3.08									100
2.2	1.66	3.652		2	2.23	4.46			Velocity
2.2	1.44	3.168		1.8	1.25	2.25				p50	DHC
2.2	0.85	1.87		1.8	1.66	2.988			Mean	1.21875	1.1666
2.8	1.12	3.136		3.2	1.88	4.576			Variance	0.192006	0.25531
3.6	0.79	2.844		2.2	1.48	3.212			Observations	44	100			Bin	p50	DHC
2	0.57	1.14		2.4	1.43	4.512			Pooled Variance	0.23614				0	0	0
1.8	1.08	1.944		1.6	0.72	1.04			Hypothesized Mean Difference	0				0.5	0	0
6.4	1	6.4		2.6	1.46	2.808			df	142				1	4.87805	2.46914
1.6	0.71	1.136		1.6	1.88	2.944			t Stat	0.593218				1.5	17.0732	13.5802
3.2	0.98	3.136		3.2	0.65	3.392			P(T<=t) one-tail	0.27699				2	29.2683	30.8642
3.4	0.73	2.482		2.6	1.08	3.146			t Critical one-tail	1.65566				2.5	19.5122	20.9877
3.8	0.87	3.306		2	1.84	1.96			P(T<=t) two-tail	0.553979				3	12.1951	11.1111
	1.06			1.4	1.06	1.932			t Critical two-tail	1.97681				3.5	7.31707	4.93827
1.8	1.3	2.34		2.2	1.21	3.3								4	7.31707	6.17284
	0.98			2.4	0.98	1.44								4.5	0	1.23457
3.2	1.78	5.696		0.8	1.38	1.76			Run length					5	0	0
2.6	0.6	1.56		2	1.5	2.8				p50	DHC			More	2.43902	8.64198
2.2	1.04	2.288		1.8	0.6	4.518			Mean	2.60946	2.82809
2.2	0.78	1.716		2.2	2.2	2.178			Variance	1.59636	2.11631				100	100
	1.58			1.6	1.4	2.544			Observations	41	81
2	0.77	1.54		2.4	2.51	2.088			Pooled Variance	1.94299
1.6	2.5	4		1.4	0.99	1.106			Hypothesized Mean Difference	0				Bin	p50	DHC
1	1.46	1.46		1.8	1.59	3.852			df	120				0	0	0
1.8	1.3	2.34		1.6	0.87	0.592			t Stat	-0.818305				0.5	0	0
1.4	1.41	1.974		1.8	0.79	3.51			P(T<=t) one-tail	0.207403				1	2.43902	1.23457
1.2	1.43	1.716		1.8	0.84	3.168			t Critical one-tail	1.65765				1.5	14.6341	11.1111
2.8	1.16	3.248		7.2	2.14	5.328			P(T<=t) two-tail	0.414805				2	29.2683	19.7531
1.8	1.06	1.908		3.6	0.37	1.692			t Critical two-tail	1.97993				2.5	12.1951	19.7531
1.2	1.62	1.944		2.4	1.95	2.016								3	7.31707	14.8148
1.4	1.06	1.484		6.6	1.76	4.686								3.5	14.6341	9.87654
2.4	0.99	2.376		4.2	0.74	1.932								4	7.31707	4.93827
				2.2	0.57	1.166								4.5	4.87805	3.7037
				8.6	0.89	4.042								5	0	7.40741
				2	0.47	1.7								More	7.31707	7.40741
				3.4	0.84	2.21
				1.4	0.51	1.036									100	100
				1.6	0.85	2.6
				1.4	0.71	1.918
				1.4	0.46	1.596
				1.2	0.53	1.872
				2	0.47	2.42
				1.6	1.23	3.648
				2.4	0.47	2.04
				1.4	0.85	1.652
				2	0.65	2.46
				1.6	0.8	1.936
				2.8	0.74	2.324
				1.4	1.625	2.548
				2.4	1.37	1.848
				1.6	1.14	3.12
				2.6	1.56	3.12
				2.4	1.21	2.808
				1.6	2.28	1.728
				4	0.85	6.16
				1.6	1.18	1.936
				2.2	1.23	2.86
				4	1.21	7.52
				6.8	1.37	8.568
				2	2.06	1.78
				2	1.73	1.88
				2.8	0.83	2.24
				3.4	1.82	1.292
				4	1.48	2.48
				2.6	0.77	2.314
				7.2	1.95	4.464
				2.4	1.2	2.352
				5.8	1.17	4.872
				6.6	1.08	5.346
					1.54
					1.21
					1.3
					1.88
					1.26
					0.89
					0.94
					0.8
					0.38
					0.62
					0.89
					0.62
					0.51
					0.35
					0.65
					0.7
					0.98
					0.84
					0.81

## Sheet: D1 DHC
Cell	x,y	plane			Area	Total Intensity	Background Signal	Corrected Intensity		Cell AVG
DHC_01_1	692686	9		Small	100	30671	288.521	1818.92		2215.17
				Big	196	58369
Cell	x,y	plane			Area	Total Intensity	Background Signal	Corrected Intensity
DHC_01_2	764747	1		Small	96	30247	296.417	1791
				Big	192	58703
Cell	x,y	plane			Area	Total Intensity	Background Signal	Corrected Intensity
DHC_01_3	786773	58		Small	144	34610	225.393	2153.43
				Big	256	59854
Cell	x,y	plane			Area	Total Intensity	Background Signal	Corrected Intensity
DHC_01_4	715755	40		Small	80	21659	252.727	1440.82
				Big	168	43899
Cell	x,y	plane			Area	Total Intensity	Background Signal	Corrected Intensity
DHC_01_5	695688	6		Small	100	35424	324.708	2953.17
				Big	196	66596
Cell	x,y	plane			Area	Total Intensity	Background Signal	Corrected Intensity
DHC_01_6	695638	18		Small	100	36447	321.031	4343.88
				Big	196	67266
Cell	x,y	plane			Area	Total Intensity	Background Signal	Corrected Intensity
DHC_01_7	698610	38		Small	100	31853	296.323	2220.71
				Big	196	60300
Cell	x,y	plane			Area	Total Intensity	Background Signal	Corrected Intensity
DHC_01_8	649662	23		Small	100	33544	312.802	2263.79
				Big	196	63573
Cell	x,y	plane			Area	Total Intensity	Background Signal	Corrected Intensity
DHC_01_9	702608	42		Small	100	31936	302.135	1722.46
				Big	196	60941
Cell	x,y	plane			Area	Total Intensity	Background Signal	Corrected Intensity
DHC_01_10	784773	27		Small	100	26779	253.354	1443.58
				Big	196	51101
Cell	x,y	plane			Area	Total Intensity	Background Signal	Corrected Intensity		Cell AVG
DHC_02_1	562754	18		Small	168	54321	283.033	6771.4		3878.29
				Big	288	88285
Cell	x,y	plane			Area	Total Intensity	Background Signal	Corrected Intensity
DHC_02_2	572751	18		Small	196	60173	271.352	6988.09
				Big	324	94906
Cell	x,y	plane			Area	Total Intensity	Background Signal	Corrected Intensity
DHC_02_3	586732	41		Small	100	28270	261.302	2139.79
				Big	196	53355
Cell	x,y	plane			Area	Total Intensity	Background Signal	Corrected Intensity
DHC_02_4	492627	47		Small	100	34396	320	2396
				Big	196	65116
Cell	x,y	plane			Area	Total Intensity	Background Signal	Corrected Intensity
DHC_02_5	544681	41		Small	100	33782	310.281	2753.88
				Big	196	63569
Cell	x,y	plane			Area	Total Intensity	Background Signal	Corrected Intensity
DHC_02_6	713644	25		Small	100	29098	272.74	1824.04
				Big	196	55281
Cell	x,y	plane			Area	Total Intensity	Background Signal	Corrected Intensity
DHC_02_7	754691	6		Small	100	37508	299.292	7578.83
				Big	196	66240
Cell	x,y	plane			Area	Total Intensity	Background Signal	Corrected Intensity
DHC_02_8	726706	67		Small	100	29919	267.333	3185.67
				Big	196	55583
Cell	x,y	plane			Area	Total Intensity	Background Signal	Corrected Intensity
DHC_02_9	846745	56		Small	100	26314	239.74	2340.04
				Big	196	49329
Cell	x,y	plane			Area	Total Intensity	Background Signal	Corrected Intensity
DHC_02_10	724634	57		Small	100	29402	265.969	2805.12
				Big	196	54935
Cell	x,y	plane			Area	Total Intensity	Background Signal	Corrected Intensity		Cell AVG
DHC_03_1	625680	6		Small	100	34932	315.125	3419.5		2597.68
				Big	196	65184
Cell	x,y	plane			Area	Total Intensity	Background Signal	Corrected Intensity
DHC_03_2	604685	20		Small	100	31462	291.271	2334.92
				Big	196	59424
Cell	x,y	plane			Area	Total Intensity	Background Signal	Corrected Intensity
DHC_03_3	643722	2		Small	100	34056	323.833	1672.67
				Big	196	65144
Cell	x,y	plane			Area	Total Intensity	Background Signal	Corrected Intensity
DHC_03_4	606733	19		Small	100	30580	282.188	2361.25
				Big	196	57670
Cell	x,y	plane			Area	Total Intensity	Background Signal	Corrected Intensity
DHC_03_5	616762	37		Small	100	28464	262.24	2240.04
				Big	196	53639
Cell	x,y	plane			Area	Total Intensity	Background Signal	Corrected Intensity
DHC_03_6	625777	56		Small	100	28219	254.458	2773.17
				Big	196	52647
Cell	x,y	plane			Area	Total Intensity	Background Signal	Corrected Intensity
DHC_03_7	613733	13		Small	100	32035	284.99	3536.04
				Big	196	59394
Cell	x,y	plane			Area	Total Intensity	Background Signal	Corrected Intensity
DHC_03_8	657723	16		Small	100	30705	288.115	1893.54
				Big	196	58364
Cell	x,y	plane			Area	Total Intensity	Background Signal	Corrected Intensity
DHC_03_9	565723	24		Small	100	31118	287.042	2413.83
				Big	196	58674
Cell	x,y	plane			Area	Total Intensity	Background Signal	Corrected Intensity
DHC_03_10	531731	55		Small	100	31660	283.281	3331.88
				Big	196	58855
Cell	x,y	plane			Area	Total Intensity	Background Signal	Corrected Intensity		Cell AVG
DHC_04_1	759711	19		Small	100	28369	262.333	2135.67		2573.74
				Big	196	53553
Cell	x,y	plane			Area	Total Intensity	Background Signal	Corrected Intensity
DHC_04_2	729752	59		Small	100	26415	240.062	2408.75
				Big	196	49461
Cell	x,y	plane			Area	Total Intensity	Background Signal	Corrected Intensity
DHC_04_3	706764	14		Small	100	32832	295.396	3292.42
				Big	196	61190
Cell	x,y	plane			Area	Total Intensity	Background Signal	Corrected Intensity
DHC_04_4	735760	66		Small	100	26978	243.479	2630.08
				Big	196	50352
Cell	x,y	plane			Area	Total Intensity	Background Signal	Corrected Intensity
DHC_04_5	681772	21		Small	100	35342	312.333	4108.67
				Big	196	65326
Cell	x,y	plane			Area	Total Intensity	Background Signal	Corrected Intensity
DHC_04_6	683706	64		Small	100	25669	246.406	1028.38
				Big	196	49324
Cell	x,y	plane			Area	Total Intensity	Background Signal	Corrected Intensity
DHC_04_7	731663	5		Small	100	33749	312.51	2497.96
				Big	196	63750
Cell	x,y	plane			Area	Total Intensity	Background Signal	Corrected Intensity
DHC_04_8	724669	28		Small	100	28106	265.25	1581
				Big	196	53570
Cell	x,y	plane			Area	Total Intensity	Background Signal	Corrected Intensity
DHC_04_9	735566	50		Small	100	32035	291.167	2918.33
				Big	196	59987
Cell	x,y	plane			Area	Total Intensity	Background Signal	Corrected Intensity
DHC_04_10	738607	62		Small	100	29983	268.469	3136.12
				Big	196	55756
Cell	x,y	plane			Area	Total Intensity	Background Signal	Corrected Intensity		Cell AVG
DHC_05_1	638685	45		Small	120	37280	264.231	5572.31		3186.96
				Big	224	64760
Cell	x,y	plane			Area	Total Intensity	Background Signal	Corrected Intensity
DHC_05_2	726685	17		Small	100	34938	307.344	4203.62
				Big	196	64443
Cell	x,y	plane			Area	Total Intensity	Background Signal	Corrected Intensity
DHC_05_3	766732	19		Small	100	30841	274.406	3400.38
				Big	196	57184
Cell	x,y	plane			Area	Total Intensity	Background Signal	Corrected Intensity
DHC_05_4	676742	28		Small	100	29725	265.448	3180.21
				Big	196	55208
Cell	x,y	plane			Area	Total Intensity	Background Signal	Corrected Intensity
DHC_05_5	871719	29		Small	100	25845	236.344	2210.62
				Big	196	48534
Cell	x,y	plane			Area	Total Intensity	Background Signal	Corrected Intensity
DHC_05_6	883728	39		Small	100	24655	229.021	1752.92
				Big	196	46641
Cell	x,y	plane			Area	Total Intensity	Background Signal	Corrected Intensity
DHC_05_7	795722	1		Small	100	32016	283.615	3654.54
				Big	196	59243
Cell	x,y	plane			Area	Total Intensity	Background Signal	Corrected Intensity
DHC_05_8	867815	21		Small	100	25986	242.667	1719.33
				Big	196	49282
Cell	x,y	plane			Area	Total Intensity	Background Signal	Corrected Intensity
DHC_05_9	843794	48		Small	100	27369	240.552	3313.79
				Big	196	50462
Cell	x,y	plane			Area	Total Intensity	Background Signal	Corrected Intensity
DHC_05_10	768763	64		Small	100	27091	242.292	2861.83
				Big	196	50351
Cell	x,y	plane			Area	Total Intensity	Background Signal	Corrected Intensity		Cell AVG
DHC_07_1		43		Small	100	27216	250.125	2203.5		3636.01
				Big	196	51228
Cell	x,y	plane			Area	Total Intensity	Background Signal	Corrected Intensity
DHC_07_2		43		Small	100	27520	248.76	2643.96
				Big	196	51401
Cell	x,y	plane			Area	Total Intensity	Background Signal	Corrected Intensity
DHC_07_3		43		Small	100	27823	254.781	2344.88
				Big	196	52282
Cell	x,y	plane			Area	Total Intensity	Background Signal	Corrected Intensity
DHC_07_4		56		Small	100	30010	260.979	3912.08
				Big	196	55064
Cell	x,y	plane			Area	Total Intensity	Background Signal	Corrected Intensity
DHC_07_5		66		Small	100	31060	274.865	3573.54
				Big	196	57447
Cell	x,y	plane			Area	Total Intensity	Background Signal	Corrected Intensity
DHC_07_6		55		Small	100	26843	249.062	1936.75
				Big	196	50753
Cell	x,y	plane			Area	Total Intensity	Background Signal	Corrected Intensity
DHC_07_7		38		Small	100	28562	260.448	2517.21
				Big	196	53565
Cell	x,y	plane			Area	Total Intensity	Background Signal	Corrected Intensity
DHC_07_8		28		Small	140	50284	295.92	8855.25
				Big	252	83427
Cell	x,y	plane			Area	Total Intensity	Background Signal	Corrected Intensity
DHC_07_9		18		Small	100	32277	273.281	4948.88
				Big	196	58512
Cell	x,y	plane			Area	Total Intensity	Background Signal	Corrected Intensity
DHC_07_10		63		Small	100	29372	259.479	3424.08
				Big	196	54282
Cell	x,y	plane			Area	Total Intensity	Background Signal	Corrected Intensity		Cell AVG
DHC_08_1		10		Small	100	42635	351.792	7455.83		3390.7
				Big	196	76407
DHC_08_2		18		Small	100	36942	334.781	3463.88
				Big	196	69081
DHC_08_3		19		Small	100	39042	355.24	3518.04
				Big	196	73145
DHC_08_4		37		Small	100	30685	282.906	2394.38
				Big	196	57844
DHC_08_5		37		Small	100	29406	267.885	2617.46
				Big	196	55123
DHC_08_6		42		Small	100	26588	243.583	2229.67
				Big	196	49972
DHC_08_7		18		Small	100	30015	279.594	2055.62
				Big	196	56856

## Sheet: D1 K560
Cell	x,y	plane			Area	Total Intensity	Background Signal	Corrected Intensity		Cell AVG
K560_01_1	825854	10		Small	100	50348	478.406	2507.38		2483.93
				Big	196	96275
Cell	x,y	plane			Area	Total Intensity	Background Signal	Corrected Intensity
K560_01_2	829796	15		Small	100	45876	437.552	2120.79
				Big	196	87881
Cell	x,y	plane			Area	Total Intensity	Background Signal	Corrected Intensity
K560_01_3	829796	15		Small	100	44194	427.594	1434.62
				Big	196	85243
Cell	x,y	plane			Area	Total Intensity	Background Signal	Corrected Intensity
K560_01_4	825686	14		Small	120	61958	503.183	1576.08
				Big	224	114289
Cell	x,y	plane			Area	Total Intensity	Background Signal	Corrected Intensity
K560_01_5	825686	14		Small	120	61958	503.183	1576.08
				Big	224	114289
Cell	x,y	plane			Area	Total Intensity	Background Signal	Corrected Intensity
K560_01_6	825687	61		Small	100	47464	436.854	3778.58
				Big	196	89402
Cell	x,y	plane			Area	Total Intensity	Background Signal	Corrected Intensity
K560_01_7	824689	55		Small	100	50011	460.062	4004.75
				Big	196	94177
Cell	x,y	plane			Area	Total Intensity	Background Signal	Corrected Intensity
K560_01_8	867668	16		Small	100	43325	426.031	721.875
				Big	196	84224
Cell	x,y	plane			Area	Total Intensity	Background Signal	Corrected Intensity
K560_01_9	883670	40		Small	100	44896	410.625	3833.5
				Big	196	84316
Cell	x,y	plane			Area	Total Intensity	Background Signal	Corrected Intensity
K560_01_10	712859	46		Small	100	56044	527.583	3285.67
				Big	196	106692
Cell	x,y	plane			Area	Total Intensity	Background Signal	Corrected Intensity		Cell AVG
K560_02_1	727752	16		Small	100	75233	727.427	2490.29		2831.63
				Big	196	145066
Cell	x,y	plane			Area	Total Intensity	Background Signal	Corrected Intensity
K560_02_2	719703	19		Small	100	76004	741.552	1848.79
				Big	196	147193
Cell	x,y	plane			Area	Total Intensity	Background Signal	Corrected Intensity
K560_02_3	750738	28		Small	100	77345	733.458	3999.17
				Big	196	147757
Cell	x,y	plane			Area	Total Intensity	Background Signal	Corrected Intensity
K560_02_4	720699	33		Small	100	77431	720.833	5347.67
				Big	196	146631
Cell	x,y	plane			Area	Total Intensity	Background Signal	Corrected Intensity
K560_02_5	736694	33		Small	100	75085	718	3285
				Big	196	144013
Cell	x,y	plane			Area	Total Intensity	Background Signal	Corrected Intensity
K560_02_6	713699	36		Small	100	71432	693.667	2065.33
				Big	196	138024
Cell	x,y	plane			Area	Total Intensity	Background Signal	Corrected Intensity
K560_02_7	731737	66		Small	100	64745	619.26	2818.96
				Big	196	124194
Cell	x,y	plane			Area	Total Intensity	Background Signal	Corrected Intensity
K560_02_8	738737	66		Small	100	65332	629.417	2390.33
				Big	196	125756
Cell	x,y	plane			Area	Total Intensity	Background Signal	Corrected Intensity
K560_02_9	749734	22		Small	100	72789	715.26	1262.96
				Big	196	141454
Cell	x,y	plane			Area	Total Intensity	Background Signal	Corrected Intensity
K560_02_10	763738	22		Small	100	84787	819.792	2807.83
				Big	196	163487
Cell	x,y	plane			Area	Total Intensity	Background Signal	Corrected Intensity		Cell AVG
K560_03_1		7		Small	100	127203	1202.48	6955.08		6689.51
				Big	196	242641
Cell	x,y	plane			Area	Total Intensity	Background Signal	Corrected Intensity
K560_03_2		7		Small	100	127760	1198.25	7935
				Big	196	242792
Cell	x,y	plane			Area	Total Intensity	Background Signal	Corrected Intensity
K560_03_3		7		Small	100	131654	1260.72	5582.12
				Big	196	252683
Cell	x,y	plane			Area	Total Intensity	Background Signal	Corrected Intensity
K560_03_4		49		Small	120	154939	1203.27	10546.5
				Big	168	212696
Cell	x,y	plane			Area	Total Intensity	Background Signal	Corrected Intensity
K560_03_5		49		Small	100	111832	1082.19	3613.25
				Big	196	215722
Cell	x,y	plane			Area	Total Intensity	Background Signal	Corrected Intensity
K560_03_6		49		Small	100	114699	1080.96	6603.17
				Big	196	218471
Cell	x,y	plane			Area	Total Intensity	Background Signal	Corrected Intensity
K560_03_7		49		Small	100	124590	1129.31	11658.8
				Big	196	233004
Cell	x,y	plane			Area	Total Intensity	Background Signal	Corrected Intensity
K560_03_8		49		Small	100	132901	1263.94	6507.25
				Big	196	254239
Cell	x,y	plane			Area	Total Intensity	Background Signal	Corrected Intensity
K560_03_9		28		Small	100	112925	1108.23	2102.08
				Big	196	219315
Cell	x,y	plane			Area	Total Intensity	Background Signal	Corrected Intensity
K560_03_10		28		Small	100	123645	1182.53	5391.88
				Big	196	237168
Cell	x,y	plane			Area	Total Intensity	Background Signal	Corrected Intensity		Cell AVG
K560_04_1		26		Small	100	128779	1256.17	3162.33		3903.76
				Big	196	249371
Cell	x,y	plane			Area	Total Intensity	Background Signal	Corrected Intensity
K560_04_2		26		Small	100	119328	1120.97	7231.12
				Big	196	226941
Cell	x,y	plane			Area	Total Intensity	Background Signal	Corrected Intensity
K560_04_3		26		Small	100	103654	993.167	4337.33
				Big	196	198998
Cell	x,y	plane			Area	Total Intensity	Background Signal	Corrected Intensity
K560_04_4		59		Small	100	102927	983.198	4607.21
				Big	196	197314
Cell	x,y	plane			Area	Total Intensity	Background Signal	Corrected Intensity
K560_04_5		59		Small	100	101131	1005.2	611.208
				Big	196	197630
Cell	x,y	plane			Area	Total Intensity	Background Signal	Corrected Intensity
K560_04_6		59		Small	100	111352	1083.55	2996.79
				Big	196	215373
Cell	x,y	plane			Area	Total Intensity	Background Signal	Corrected Intensity
K560_04_7		70		Small	100	100550	976.667	2883.33
				Big	196	194310
Cell	x,y	plane			Area	Total Intensity	Background Signal	Corrected Intensity
K560_04_8		70		Small	100	112727	1042.61	8465.54
				Big	196	212818
Cell	x,y	plane			Area	Total Intensity	Background Signal	Corrected Intensity
K560_04_9		70		Small	100	96668	949.927	1675.29
				Big	196	187861
Cell	x,y	plane			Area	Total Intensity	Background Signal	Corrected Intensity
K560_04_10		49		Small	100	112807	1097.4	3067.42
				Big	196	218157
Cell	x,y	plane			Area	Total Intensity	Background Signal	Corrected Intensity		Cell AVG
K560_06_1		59		Small	100	69924	687.677	1156.29		3926.89
				Big	196	135941
Cell	x,y	plane			Area	Total Intensity	Background Signal	Corrected Intensity
K560_06_2		59		Small	100	71572	704.812	1090.75
				Big	196	139234
Cell	x,y	plane			Area	Total Intensity	Background Signal	Corrected Intensity
K560_06_3		59		Small	100	75655	685.458	7109.17
				Big	196	141459
Cell	x,y	plane			Area	Total Intensity	Background Signal	Corrected Intensity
K560_06_4		59		Small	100	78635	733.25	5310
				Big	196	149027
Cell	x,y	plane			Area	Total Intensity	Background Signal	Corrected Intensity
K560_06_5		70		Small	100	77826	710	6826
				Big	196	145986
Cell	x,y	plane			Area	Total Intensity	Background Signal	Corrected Intensity
K560_06_6		70		Small	100	76690	742.917	2398.33
				Big	196	148010
Cell	x,y	plane			Area	Total Intensity	Background Signal	Corrected Intensity
K560_06_7		70		Small	100	74184	721.115	2072.54
				Big	196	143411
Cell	x,y	plane			Area	Total Intensity	Background Signal	Corrected Intensity
K560_06_8		70		Small	100	80910	752.646	5645.42
				Big	196	153164
Cell	x,y	plane			Area	Total Intensity	Background Signal	Corrected Intensity
K560_06_9		70		Small	100	78967	744.292	4537.83
				Big	196	150419
Cell	x,y	plane			Area	Total Intensity	Background Signal	Corrected Intensity
K560_06_10		70		Small	100	74309	711.865	3122.54
				Big	196	142648
Cell	x,y	plane			Area	Total Intensity	Background Signal	Corrected Intensity		Cell AVG
K560_07_1		60		Small	100	74606	723.146	2291.42		3264.86
				Big	196	144028
Cell	x,y	plane			Area	Total Intensity	Background Signal	Corrected Intensity
K560_07_2		60		Small	100	75513	723.188	3194.25
				Big	196	144939
Cell	x,y	plane			Area	Total Intensity	Background Signal	Corrected Intensity
K560_07_3		60		Small	100	76315	738.146	2500.42
				Big	196	147177
Cell	x,y	plane			Area	Total Intensity	Background Signal	Corrected Intensity
K560_07_4		60		Small	100	76641	720.323	4608.71
				Big	196	145792
Cell	x,y	plane			Area	Total Intensity	Background Signal	Corrected Intensity
K560_07_5		17		Small	100	82357	785.344	3822.62
				Big	196	157750
Cell	x,y	plane			Area	Total Intensity	Background Signal	Corrected Intensity
K560_07_6		17		Small	100	80914	779.24	2990.04
				Big	196	155721
Cell	x,y	plane			Area	Total Intensity	Background Signal	Corrected Intensity
K560_07_7		17		Small	100	79163	773.25	1838
				Big	196	153395
Cell	x,y	plane			Area	Total Intensity	Background Signal	Corrected Intensity
K560_07_8		17		Small	100	80168	759.417	4226.33
				Big	196	153072
Cell	x,y	plane			Area	Total Intensity	Background Signal	Corrected Intensity
K560_07_9		9		Small	100	84607	790.333	5573.67
				Big	196	160479
Cell	x,y	plane			Area	Total Intensity	Background Signal	Corrected Intensity
K560_07_10		9		Small	100	86024	844.208	1603.17
				Big	196	167068

## Sheet: D1 p50
Cell	x,y	plane			Area	Total Intensity	Background Signal	Corrected Intensity		Cell AVG
p50_01_1	737744	3		Small	100	32068	309.365	1131.54		1471.71
				Big	196	61767
Cell	x,y	plane			Area	Total Intensity	Background Signal	Corrected Intensity
p50_01_2	714769	26		Small	100	28220	266.635	1556.46
				Big	196	53817
Cell	x,y	plane			Area	Total Intensity	Background Signal	Corrected Intensity
p50_01_3	740787	9		Small	100	29663	285.115	1151.54
				Big	196	57034
Cell	x,y	plane			Area	Total Intensity	Background Signal	Corrected Intensity
p50_01_4	709888	27		Small	100	28974	277.885	1185.46
				Big	196	55651
Cell	x,y	plane			Area	Total Intensity	Background Signal	Corrected Intensity
p50_01_5	683851	64		Small	100	25132	239.74	1158.04
				Big	196	48147
Cell	x,y	plane			Area	Total Intensity	Background Signal	Corrected Intensity
p50_01_6	624706	36		Small	100	33126	301.823	2943.71
				Big	196	62101
Cell	x,y	plane			Area	Total Intensity	Background Signal	Corrected Intensity
p50_01_7	606714	14		Small	100	32419	312.438	1175.25
				Big	196	62413

## Sheet: D2 DHC
Cell	x,y	plane			Area	Total Intensity	Background Signal	Corrected Intensity		Cell AVG
DHC_01_1		10		Small	100	40755	371.302	3624.79		2670.05
				Big	196	76400
Cell	x,y	plane			Area	Total Intensity	Background Signal	Corrected Intensity
DHC_01_2		16		Small	100	35637	340.25	1612
				Big	196	68301
Cell	x,y	plane			Area	Total Intensity	Background Signal	Corrected Intensity
DHC_01_3		51		Small	100	34242	295.562	4685.75
				Big	196	62616
Cell	x,y	plane			Area	Total Intensity	Background Signal	Corrected Intensity
DHC_01_4		53		Small	100	32080	301.427	1937.29
				Big	196	61017
Cell	x,y	plane			Area	Total Intensity	Background Signal	Corrected Intensity
DHC_01_5		53		Small	100	31552	287.646	2787.42
				Big	196	59166
Cell	x,y	plane			Area	Total Intensity	Background Signal	Corrected Intensity
DHC_01_6		13		Small	100	38136	349.656	3170.38
				Big	196	71703
Cell	x,y	plane			Area	Total Intensity	Background Signal	Corrected Intensity
DHC_01_7		5		Small	100	39426	379.552	1470.79
				Big	196	75863
Cell	x,y	plane			Area	Total Intensity	Background Signal	Corrected Intensity
DHC_01_8		47		Small	100	30833	276.25	3208
				Big	196	57353
Cell	x,y	plane			Area	Total Intensity	Background Signal	Corrected Intensity
DHC_01_9		61		Small	100	29679	270.448	2634.21
				Big	196	55642
Cell	x,y	plane			Area	Total Intensity	Background Signal	Corrected Intensity
DHC_01_10		61		Small	100	45074	435.042	1569.83
				Big	196	86838
Cell	x,y	plane			Area	Total Intensity	Background Signal	Corrected Intensity		Cell AVG
DHC_02_1		38		Small	100	31537	298.167	1720.33		2497.02
				Big	196	60161
Cell	x,y	plane			Area	Total Intensity	Background Signal	Corrected Intensity
DHC_02_2		46		Small	100	34331	311.552	3175.79
				Big	196	64240
Cell	x,y	plane			Area	Total Intensity	Background Signal	Corrected Intensity
DHC_02_3		48		Small	100	32759	300.979	2661.08
				Big	196	61653
Cell	x,y	plane			Area	Total Intensity	Background Signal	Corrected Intensity
DHC_02_4		20		Small	100	34365	309.906	3374.38
				Big	196	64116
Cell	x,y	plane			Area	Total Intensity	Background Signal	Corrected Intensity
DHC_02_5		45		Small	100	27813	262.99	1514.04
				Big	196	53060
Cell	x,y	plane			Area	Total Intensity	Background Signal	Corrected Intensity
DHC_02_6		21		Small	100	32623	306.771	1945.92
				Big	196	62073
Cell	x,y	plane			Area	Total Intensity	Background Signal	Corrected Intensity
DHC_02_7		67		Small	100	29802	279	1902
				Big	196	56586
Cell	x,y	plane			Area	Total Intensity	Background Signal	Corrected Intensity
DHC_02_8		11		Small	100	34683	308.635	3819.46
				Big	196	64312
Cell	x,y	plane			Area	Total Intensity	Background Signal	Corrected Intensity
DHC_02_9		20		Small	100	31592	288.917	2700.33
				Big	196	59328
Cell	x,y	plane			Area	Total Intensity	Background Signal	Corrected Intensity
DHC_02_10		8		Small	100	38560	364.031	2156.88
				Big	196	73507
Cell	x,y	plane			Area	Total Intensity	Background Signal	Corrected Intensity		Cell AVG
DHC_03_1		11		Small	100	41120	357.854	5334.58		3119.48
				Big	196	75474
Cell	x,y	plane			Area	Total Intensity	Background Signal	Corrected Intensity
DHC_03_2		19		Small	100	32566	297.188	2847.25
				Big	196	61096
Cell	x,y	plane			Area	Total Intensity	Background Signal	Corrected Intensity
DHC_03_3		1		Small	100	39678	351.812	4496.75
				Big	196	73452
Cell	x,y	plane			Area	Total Intensity	Background Signal	Corrected Intensity
DHC_03_4		27		Small	100	32530	299.823	2547.71
				Big	196	61313
Cell	x,y	plane			Area	Total Intensity	Background Signal	Corrected Intensity
DHC_03_5		21		Small	100	35385	331.792	2205.83
				Big	196	67237
Cell	x,y	plane			Area	Total Intensity	Background Signal	Corrected Intensity
DHC_03_6		60		Small	100	32252	297.521	2499.92
				Big	196	60814
Cell	x,y	plane			Area	Total Intensity	Background Signal	Corrected Intensity
DHC_03_7		15		Small	100	37815	351.667	2648.33
				Big	196	71575
Cell	x,y	plane			Area	Total Intensity	Background Signal	Corrected Intensity
DHC_03_8		27		Small	100	32580	300.281	2551.88
				Big	196	61407
Cell	x,y	plane			Area	Total Intensity	Background Signal	Corrected Intensity
DHC_03_9		62		Small	100	26471	249.052	1565.79
				Big	196	50380
Cell	x,y	plane			Area	Total Intensity	Background Signal	Corrected Intensity
DHC_03_10		1		Small	100	39678	351.812	4496.75
				Big	196	73452
Cell	x,y	plane			Area	Total Intensity	Background Signal	Corrected Intensity		Cell AVG
DHC_04_1		1		Small	100	39965	383.656	1599.38		2025.78
				Big	196	76796
Cell	x,y	plane			Area	Total Intensity	Background Signal	Corrected Intensity
DHC_04_2		1		Small	100	42875	404.281	2446.88
				Big	196	81686
Cell	x,y	plane			Area	Total Intensity	Background Signal	Corrected Intensity
DHC_04_3		54		Small	100	25840	244.792	1360.83
				Big	196	49340
Cell	x,y	plane			Area	Total Intensity	Background Signal	Corrected Intensity
DHC_04_4		34		Small	100	29069	277.76	1292.96
				Big	196	55734
Cell	x,y	plane			Area	Total Intensity	Background Signal	Corrected Intensity
DHC_04_5		10		Small	100	32858	307.875	2070.5
				Big	196	62414
Cell	x,y	plane			Area	Total Intensity	Background Signal	Corrected Intensity
DHC_04_6		3		Small	100	39831	364.469	3384.12
				Big	196	74820
Cell	x,y	plane			Area	Total Intensity	Background Signal	Corrected Intensity		Cell AVG
DHC_05_1		34		Small	100	27161	251.323	2028.71		2561.44
				Big	196	51288
Cell	x,y	plane			Area	Total Intensity	Background Signal	Corrected Intensity
DHC_05_2		23		Small	100	28415	260.083	2406.67
				Big	196	53383
Cell	x,y	plane			Area	Total Intensity	Background Signal	Corrected Intensity
DHC_05_3		36		Small	100	26368	245.74	1794.04
				Big	196	49959
Cell	x,y	plane			Area	Total Intensity	Background Signal	Corrected Intensity
DHC_05_4		38		Small	100	26772	248.365	1935.54
				Big	196	50615
Cell	x,y	plane			Area	Total Intensity	Background Signal	Corrected Intensity
DHC_05_5		44		Small	100	27502	243.271	3174.92
				Big	196	50856
Cell	x,y	plane			Area	Total Intensity	Background Signal	Corrected Intensity
DHC_05_6		55		Small	100	35326	317.833	3542.67
				Big	196	65838
Cell	x,y	plane			Area	Total Intensity	Background Signal	Corrected Intensity
DHC_05_7		22		Small	100	33675	317.948	1880.21
				Big	196	64198
Cell	x,y	plane			Area	Total Intensity	Background Signal	Corrected Intensity
DHC_05_8		46		Small	100	33528	309.302	2597.79
				Big	196	63221
Cell	x,y	plane			Area	Total Intensity	Background Signal	Corrected Intensity
DHC_05_9		49		Small	100	26928	247.49	2179.04
				Big	196	50687
Cell	x,y	plane			Area	Total Intensity	Background Signal	Corrected Intensity
DHC_05_10		15		Small	100	32605	285.302	4074.79
				Big	196	59994
Cell	x,y	plane			Area	Total Intensity	Background Signal	Corrected Intensity		Cell AVG
DHC_06_1		23		Small	100	36015	320.052	4009.79		2888.19
				Big	196	66740
Cell	x,y	plane			Area	Total Intensity	Background Signal	Corrected Intensity
DHC_06_2		23		Small	100	33548	314.281	2119.88
				Big	196	63719
Cell	x,y	plane			Area	Total Intensity	Background Signal	Corrected Intensity
DHC_06_3		30		Small	100	33680	310.615	2618.54
				Big	196	63499
Cell	x,y	plane			Area	Total Intensity	Background Signal	Corrected Intensity
DHC_06_4		40		Small	100	34108	298.958	4212.17
				Big	196	62808
Cell	x,y	plane			Area	Total Intensity	Background Signal	Corrected Intensity
DHC_06_5		45		Small	100	29454	280.667	1387.33
				Big	196	56398
Cell	x,y	plane			Area	Total Intensity	Background Signal	Corrected Intensity
DHC_06_6		35		Small	100	32020	292.115	2808.54
				Big	196	60063
Cell	x,y	plane			Area	Total Intensity	Background Signal	Corrected Intensity
DHC_06_7		28		Small	100	33426	313.667	2059.33
				Big	196	63538
Cell	x,y	plane			Area	Total Intensity	Background Signal	Corrected Intensity
DHC_06_8		11		Small	100	41792	379.021	3889.92
				Big	196	78178
Cell	x,y	plane			Area	Total Intensity	Background Signal	Corrected Intensity		Cell AVG
DHC_09_1		6		Small	100	41533	363.688	5164.25		2984.84
				Big	196	76447
Cell	x,y	plane			Area	Total Intensity	Background Signal	Corrected Intensity
DHC_09_2		27		Small	100	31585	296.26	1958.96
				Big	196	60026
Cell	x,y	plane			Area	Total Intensity	Background Signal	Corrected Intensity
DHC_09_3		69		Small	100	29796	276.812	2114.75
				Big	196	56370
Cell	x,y	plane			Area	Total Intensity	Background Signal	Corrected Intensity
DHC_09_4		39		Small	100	32785	303.146	2470.42
				Big	196	61887
Cell	x,y	plane			Area	Total Intensity	Background Signal	Corrected Intensity
DHC_09_5		12		Small	100	41351	386.479	2703.08
				Big	196	78453
Cell	x,y	plane			Area	Total Intensity	Background Signal	Corrected Intensity
DHC_09_6		19		Small	100	39615	347.375	4877.5
				Big	196	72963
Cell	x,y	plane			Area	Total Intensity	Background Signal	Corrected Intensity
DHC_09_7		22		Small	100	35816	325.125	3303.5
				Big	196	67028
Cell	x,y	plane			Area	Total Intensity	Background Signal	Corrected Intensity
DHC_09_8		20		Small	100	34794	318.51	2942.96
				Big	196	65371
Cell	x,y	plane			Area	Total Intensity	Background Signal	Corrected Intensity
DHC_09_9		24		Small	100	33240	304.781	2761.88
				Big	196	62499
Cell	x,y	plane			Area	Total Intensity	Background Signal	Corrected Intensity
DHC_09_10		53		Small	100	30099	285.479	1551.08
				Big	196	57505
Cell	x,y	plane			Area	Total Intensity	Background Signal	Corrected Intensity		Cell AVG
DHC_10_1		14		Small	100	37969	333.812	4587.75		2507.52
				Big	196	70015
Cell	x,y	plane			Area	Total Intensity	Background Signal	Corrected Intensity
DHC_10_2		24		Small	100	33803	322.792	1523.83
				Big	196	64791
Cell	x,y	plane			Area	Total Intensity	Background Signal	Corrected Intensity
DHC_10_3		4		Small	100	41161	374.562	3704.75
				Big	196	77119
Cell	x,y	plane			Area	Total Intensity	Background Signal	Corrected Intensity
DHC_10_4		15		Small	100	34045	320.01	2043.96
				Big	196	64766
Cell	x,y	plane			Area	Total Intensity	Background Signal	Corrected Intensity
DHC_10_5		12		Small	100	41005	373.333	3671.67
				Big	196	76845
Cell	x,y	plane			Area	Total Intensity	Background Signal	Corrected Intensity
DHC_10_6		28		Small	100	35470	332.177	2252.29
				Big	196	67359
Cell	x,y	plane			Area	Total Intensity	Background Signal	Corrected Intensity
DHC_10_7		37		Small	100	26535	250.104	1524.58
				Big	196	50545
Cell	x,y	plane			Area	Total Intensity	Background Signal	Corrected Intensity
DHC_10_8		10		Small	100	31554	298.052	1748.79
				Big	196	60167
Cell	x,y	plane			Area	Total Intensity	Background Signal	Corrected Intensity
DHC_10_9		40		Small	100	30054	276.302	2423.79
				Big	196	56579
Cell	x,y	plane			Area	Total Intensity	Background Signal	Corrected Intensity
DHC_10_10		34		Small	100	29025	274.312	1593.75
				Big	196	55359
Cell	x,y	plane			Area	Total Intensity	Background Signal	Corrected Intensity		Cell AVG
DHC_12_1		24		Small	100	30336	279.083	2427.67		2037.33
				Big	196	57128
Cell	x,y	plane			Area	Total Intensity	Background Signal	Corrected Intensity
DHC_12_2		39		Small	100	30127	271.833	2943.67
				Big	196	56223
Cell	x,y	plane			Area	Total Intensity	Background Signal	Corrected Intensity
DHC_12_3		32		Small	100	28733	269.927	1740.29
				Big	196	54646
Cell	x,y	plane			Area	Total Intensity	Background Signal	Corrected Intensity
DHC_12_4		50		Small	100	28863	272.531	1609.88
				Big	196	55026
Cell	x,y	plane			Area	Total Intensity	Background Signal	Corrected Intensity
DHC_12_5		27		Small	100	27466	265.292	936.833
				Big	196	52934
Cell	x,y	plane			Area	Total Intensity	Background Signal	Corrected Intensity
DHC_12_6		27		Small	100	27029	261.271	901.917
				Big	196	52111
Cell	x,y	plane			Area	Total Intensity	Background Signal	Corrected Intensity
DHC_12_7		27		Small	100	27907	268.531	1053.88
				Big	196	53686
Cell	x,y	plane			Area	Total Intensity	Background Signal	Corrected Intensity
DHC_12_8		7		Small	100	34809	314.604	3348.58
				Big	196	65011
Cell	x,y	plane			Area	Total Intensity	Background Signal	Corrected Intensity
DHC_12_9		5		Small	100	35225	328.167	2408.33
				Big	196	66729
Cell	x,y	plane			Area	Total Intensity	Background Signal	Corrected Intensity
DHC_12_10		48		Small	100	29870	268.677	3002.29
				Big	196	55663

## Sheet: D2 p50
Cell	x,y	plane			Area	Total Intensity	Background Signal	Corrected Intensity		Cell AVG
p50_01_1		37		Small	100	28668	266.396	2028.42		1498.16
				Big	196	54242
Cell	x,y	plane			Area	Total Intensity	Background Signal	Corrected Intensity
p50_01_2		37		Small	100	27989	257.417	2247.33
				Big	196	52701
Cell	x,y	plane			Area	Total Intensity	Background Signal	Corrected Intensity
p50_01_3		37		Small	100	25991	249.917	999.333
				Big	196	49983
Cell	x,y	plane			Area	Total Intensity	Background Signal	Corrected Intensity
p50_01_4		37		Small	100	30947	298.25	1122
				Big	196	59579
Cell	x,y	plane			Area	Total Intensity	Background Signal	Corrected Intensity
p50_01_5		43		Small	100	26563	252.125	1350.5
				Big	196	50767
Cell	x,y	plane			Area	Total Intensity	Background Signal	Corrected Intensity
p50_01_6		28		Small	100	27732	264.906	1241.38
				Big	196	53163
Cell	x,y	plane			Area	Total Intensity	Background Signal	Corrected Intensity		Cell AVG
p50_02_1		18		Small	100	28065	265.448	1520.21		1411.58
				Big	196	53548
Cell	x,y	plane			Area	Total Intensity	Background Signal	Corrected Intensity
p50_02_2		23		Small	100	27279	255.844	1694.62
				Big	196	51840
Cell	x,y	plane			Area	Total Intensity	Background Signal	Corrected Intensity
p50_02_3		29		Small	100	28685	268.146	1870.42
				Big	196	54427
Cell	x,y	plane			Area	Total Intensity	Background Signal	Corrected Intensity
p50_02_4		49		Small	100	28654	268.396	1814.42
				Big	196	54420
Cell	x,y	plane			Area	Total Intensity	Background Signal	Corrected Intensity
p50_02_5		47		Small	100	27948	269.104	1037.58
				Big	196	53782
Cell	x,y	plane			Area	Total Intensity	Background Signal	Corrected Intensity
p50_02_6		18		Small	100	28065	265.448	1520.21
				Big	196	53548
Cell	x,y	plane			Area	Total Intensity	Background Signal	Corrected Intensity
p50_02_7		25		Small	100	26101	257.219	379.125
				Big	196	50794
Cell	x,y	plane			Area	Total Intensity	Background Signal	Corrected Intensity
p50_02_8		24		Small	100	26429	249.729	1456.08
				Big	196	50403
Cell	x,y	plane			Area	Total Intensity	Background Signal	Corrected Intensity		Cell AVG
p50_03_1		16		Small	100	29352	282.906	1061.38		1362.18
				Big	196	56511
Cell	x,y	plane			Area	Total Intensity	Background Signal	Corrected Intensity
p50_03_2		28		Small	100	29585	281.656	1419.38
				Big	196	56624
Cell	x,y	plane			Area	Total Intensity	Background Signal	Corrected Intensity
p50_03_3		41		Small	100	28033	265.948	1438.21
				Big	196	53564
Cell	x,y	plane			Area	Total Intensity	Background Signal	Corrected Intensity
p50_03_4		18		Small	100	29906	277.708	2135.17
				Big	196	56566
Cell	x,y	plane			Area	Total Intensity	Background Signal	Corrected Intensity
p50_03_5		34		Small	100	26886	253.844	1501.62
				Big	196	51255
Cell	x,y	plane			Area	Total Intensity	Background Signal	Corrected Intensity
p50_03_6		53		Small	100	25826	242.729	1553.08
				Big	196	49128
Cell	x,y	plane			Area	Total Intensity	Background Signal	Corrected Intensity
p50_03_7		15		Small	100	30221	284.99	1722.04
				Big	196	57580
Cell	x,y	plane			Area	Total Intensity	Background Signal	Corrected Intensity
p50_03_8		9		Small	100	30175	297.448	430.208
				Big	196	58730
Cell	x,y	plane			Area	Total Intensity	Background Signal	Corrected Intensity
p50_03_9		56		Small	100	25921	243.552	1565.79
				Big	196	49302
Cell	x,y	plane			Area	Total Intensity	Background Signal	Corrected Intensity
p50_03_10		52		Small	100	25647	248.521	794.917
				Big	196	49505
Cell	x,y	plane			Area	Total Intensity	Background Signal	Corrected Intensity		Cell AVG
p50_04_1		37		Small	100	23854	217.51	2102.96		1480.02
				Big	196	44735
Cell	x,y	plane			Area	Total Intensity	Background Signal	Corrected Intensity
p50_04_2		36		Small	100	25530	237.208	1809.17
				Big	196	48302
Cell	x,y	plane			Area	Total Intensity	Background Signal	Corrected Intensity
p50_04_3		19		Small	100	25823	243.25	1498
				Big	196	49175
Cell	x,y	plane			Area	Total Intensity	Background Signal	Corrected Intensity
p50_04_4		29		Small	100	25624	238.948	1729.21
				Big	196	48563
Cell	x,y	plane			Area	Total Intensity	Background Signal	Corrected Intensity
p50_04_5		40		Small	100	25317	234.052	1911.79
				Big	196	47786
Cell	x,y	plane			Area	Total Intensity	Background Signal	Corrected Intensity
p50_04_6		25		Small	100	26248	256.083	639.667
				Big	196	50832
Cell	x,y	plane			Area	Total Intensity	Background Signal	Corrected Intensity
p50_04_7		64		Small	100	23237	215.948	1642.21
				Big	196	43968
Cell	x,y	plane			Area	Total Intensity	Background Signal	Corrected Intensity
p50_04_8		23		Small	100	26811	251.427	1668.29
				Big	196	50948
Cell	x,y	plane			Area	Total Intensity	Background Signal	Corrected Intensity
p50_04_9		64		Small	100	25327	244.708	856.167
				Big	196	48819
Cell	x,y	plane			Area	Total Intensity	Background Signal	Corrected Intensity
p50_04_10		36		Small	100	27825	268.823	942.708
				Big	196	53632
Cell	x,y	plane			Area	Total Intensity	Background Signal	Corrected Intensity		Cell AVG
p50_05_1		22		Small	100	27983	261.521	1830.92		1897.76
				Big	196	53089
Cell	x,y	plane			Area	Total Intensity	Background Signal	Corrected Intensity
p50_05_2		56		Small	100	26975	253.031	1671.88
				Big	196	51266
Cell	x,y	plane			Area	Total Intensity	Background Signal	Corrected Intensity
p50_05_3		67		Small	100	28778	265.875	2190.5
				Big	196	54302
Cell	x,y	plane			Area	Total Intensity	Background Signal	Corrected Intensity		Cell AVG
p50_06_1		43		Small	100	27121	256.469	1474.12		1225.96
				Big	196	51742
Cell	x,y	plane			Area	Total Intensity	Background Signal	Corrected Intensity
p50_06_2		37		Small	100	28373	269.312	1441.75
				Big	196	54227
Cell	x,y	plane			Area	Total Intensity	Background Signal	Corrected Intensity
p50_06_3		52		Small	100	26144	251.938	950.25
				Big	196	50330
Cell	x,y	plane			Area	Total Intensity	Background Signal	Corrected Intensity
p50_06_4		53		Small	100	27176	266.312	544.75
				Big	196	52742
Cell	x,y	plane			Area	Total Intensity	Background Signal	Corrected Intensity
p50_06_5		53		Small	100	27396	256.771	1718.92
				Big	196	52046
Cell	x,y	plane			Area	Total Intensity	Background Signal	Corrected Intensity		Cell AVG
p50_07_1		48		Small	100	28032	268.594	1172.62		980.806
				Big	196	53817
Cell	x,y	plane			Area	Total Intensity	Background Signal	Corrected Intensity
p50_07_2		38		Small	100	28653	280.99	554.042
				Big	196	55628
Cell	x,y	plane			Area	Total Intensity	Background Signal	Corrected Intensity
p50_07_3		38		Small	100	27222	260.062	1215.75
				Big	196	52188
Cell	x,y	plane			Area	Total Intensity	Background Signal	Corrected Intensity		Cell AVG
p50_08_1		5		Small	100	30647	289.156	1731.38		1346.35
				Big	196	58406
Cell	x,y	plane			Area	Total Intensity	Background Signal	Corrected Intensity
p50_08_2		69		Small	100	23661	229.229	738.083
				Big	196	45667
Cell	x,y	plane			Area	Total Intensity	Background Signal	Corrected Intensity
p50_08_3		30		Small	100	25180	243.719	808.125
				Big	196	48577
Cell	x,y	plane			Area	Total Intensity	Background Signal	Corrected Intensity
p50_08_4		30		Small	100	29685	281.448	1540.21
				Big	196	56704
Cell	x,y	plane			Area	Total Intensity	Background Signal	Corrected Intensity
p50_08_5		30		Small	100	27661	258.552	1805.79
				Big	196	52482
Cell	x,y	plane			Area	Total Intensity	Background Signal	Corrected Intensity
p50_08_6		58		Small	100	25842	243.875	1454.5
				Big	196	49254
Cell	x,y	plane			Area	Total Intensity	Background Signal	Corrected Intensity		Cell AVG
p50_09_1		53		Small	100	24765	230.323	1732.71		1391.85
				Big	196	46876
Cell	x,y	plane			Area	Total Intensity	Background Signal	Corrected Intensity
p50_09_2		42		Small	100	24758	237.5	1008
				Big	196	47558
Cell	x,y	plane			Area	Total Intensity	Background Signal	Corrected Intensity
p50_09_3		52		Small	100	24177	229.219	1255.12
				Big	196	46182
Cell	x,y	plane			Area	Total Intensity	Background Signal	Corrected Intensity
p50_09_4		64		Small	100	25102	238.365	1265.54
				Big	196	47985
Cell	x,y	plane			Area	Total Intensity	Background Signal	Corrected Intensity
p50_09_5		17		Small	100	29469	275.115	1957.54
				Big	196	55880
Cell	x,y	plane			Area	Total Intensity	Background Signal	Corrected Intensity
p50_09_6		46		Small	100	26076	248.896	1186.42
				Big	196	49970
Cell	x,y	plane			Area	Total Intensity	Background Signal	Corrected Intensity
p50_09_7		16		Small	100	28437	267	1737
				Big	196	54069
Cell	x,y	plane			Area	Total Intensity	Background Signal	Corrected Intensity
p50_09_8		29		Small	100	28706	277.135	992.458
				Big	196	55311
Cell	x,y	plane			Area	Total Intensity	Background Signal	Corrected Intensity		Cell AVG
p50_10_1		53		Small	100	25687	240.104	1676.58		1386.25
				Big	196	48737
Cell	x,y	plane			Area	Total Intensity	Background Signal	Corrected Intensity
p50_10_2		20		Small	100	28382	272.406	1141.38
				Big	196	54533
Cell	x,y	plane			Area	Total Intensity	Background Signal	Corrected Intensity
p50_10_3		59		Small	100	25976	247.906	1185.38
				Big	196	49775
Cell	x,y	plane			Area	Total Intensity	Background Signal	Corrected Intensity
p50_10_4		6		Small	100	31281	304.958	785.167
				Big	196	60557
Cell	x,y	plane			Area	Total Intensity	Background Signal	Corrected Intensity
p50_10_5		8		Small	100	30033	286.583	1374.67
				Big	196	57545
Cell	x,y	plane			Area	Total Intensity	Background Signal	Corrected Intensity
p50_10_6		22		Small	100	30076	285.219	1554.12
				Big	196	57457
Cell	x,y	plane			Area	Total Intensity	Background Signal	Corrected Intensity
p50_10_7		11		Small	100	32427	304.521	1974.92
				Big	196	61661
Cell	x,y	plane			Area	Total Intensity	Background Signal	Corrected Intensity
p50_10_8		40		Small	100	28646	269.635	1682.46
				Big	196	54531
Cell	x,y	plane			Area	Total Intensity	Background Signal	Corrected Intensity
p50_10_9		34		Small	100	26410	251.906	1219.38
				Big	196	50593
Cell	x,y	plane			Area	Total Intensity	Background Signal	Corrected Intensity
p50_10_10		34		Small	100	24456	231.875	1268.5
				Big	196	46716
Cell	x,y	plane			Area	Total Intensity	Background Signal	Corrected Intensity		Cell AVG
p50_11_1		11		Small	100	30076	287.323	1343.71		1276.48
				Big	196	57659
Cell	x,y	plane			Area	Total Intensity	Background Signal	Corrected Intensity
p50_11_2		16		Small	100	28353	271.438	1209.25
				Big	196	54411
Cell	x,y	plane			Area	Total Intensity	Background Signal	Corrected Intensity		Cell AVG
p50_12_1		18		Small	100	29843	279.51	1891.96		1567.68
				Big	196	56676
Cell	x,y	plane			Area	Total Intensity	Background Signal	Corrected Intensity
p50_12_2		29		Small	100	27765	265.625	1202.5
				Big	196	53265
Cell	x,y	plane			Area	Total Intensity	Background Signal	Corrected Intensity
p50_12_3		60		Small	100	26469	248.604	1608.58
				Big	196	50335
Area	Integrated Intensity
100	36015
196	66740

## Sheet: D2 K560
Cell	x,y	plane			Area	Total Intensity	Background Signal	Corrected Intensity		Cell AVG
K560_01_1		11		Small	100	31885	309.844	900.625		2291.67
				Big	196	61630
Cell	x,y	plane			Area	Total Intensity	Background Signal	Corrected Intensity
K560_01_2		11		Small	100	33469	311.281	2340.88
				Big	196	63352
Cell	x,y	plane			Area	Total Intensity	Background Signal	Corrected Intensity
K560_01_3		11		Small	100	34879	325.969	2282.12
				Big	196	66172
Cell	x,y	plane			Area	Total Intensity	Background Signal	Corrected Intensity
K560_01_4		11		Small	100	35833	332.927	2540.29
				Big	196	67794
Cell	x,y	plane			Area	Total Intensity	Background Signal	Corrected Intensity
K560_01_5		11		Small	100	34312	326.823	1629.71
				Big	196	65687
Cell	x,y	plane			Area	Total Intensity	Background Signal	Corrected Intensity
K560_01_6		50		Small	100	31983	291.74	2809.04
				Big	196	59990
Cell	x,y	plane			Area	Total Intensity	Background Signal	Corrected Intensity
K560_01_7		50		Small	100	30106	275.792	2526.83
				Big	196	56582
Cell	x,y	plane			Area	Total Intensity	Background Signal	Corrected Intensity
K560_01_8		50		Small	100	28768	272.052	1562.79
				Big	196	54885
Cell	x,y	plane			Area	Total Intensity	Background Signal	Corrected Intensity
K560_01_9		50		Small	100	30668	290.25	1643
				Big	196	58532
Cell	x,y	plane			Area	Total Intensity	Background Signal	Corrected Intensity
K560_01_10		50		Small	100	34897	302.156	4681.38
				Big	196	63904
Cell	x,y	plane			Area	Total Intensity	Background Signal	Corrected Intensity		Cell AVG
K560_02_1		23		Small	100	30688	277.167	2971.33		2358.55
				Big	196	57296
Cell	x,y	plane			Area	Total Intensity	Background Signal	Corrected Intensity
K560_02_2		23		Small	100	30750	284.771	2272.92
				Big	196	58088
Cell	x,y	plane			Area	Total Intensity	Background Signal	Corrected Intensity
K560_02_3		23		Small	100	30814	289.865	1827.54
				Big	196	58641
Cell	x,y	plane			Area	Total Intensity	Background Signal	Corrected Intensity
K560_02_4		23		Small	100	32436	289.49	3487.04
				Big	196	60227
Cell	x,y	plane			Area	Total Intensity	Background Signal	Corrected Intensity
K560_02_5		23		Small	100	31665	292.479	2417.08
				Big	196	59743
Cell	x,y	plane			Area	Total Intensity	Background Signal	Corrected Intensity
K560_02_6		23		Small	100	33706	299.323	3773.71
				Big	196	62441
Cell	x,y	plane			Area	Total Intensity	Background Signal	Corrected Intensity
K560_02_7		23		Small	100	31050	288.198	2230.21
				Big	196	58717
Cell	x,y	plane			Area	Total Intensity	Background Signal	Corrected Intensity
K560_02_8		23		Small	100	31178	302.344	943.625
				Big	196	60203
Cell	x,y	plane			Area	Total Intensity	Background Signal	Corrected Intensity
K560_02_9		23		Small	100	29518	280.677	1450.29
				Big	196	56463
Cell	x,y	plane			Area	Total Intensity	Background Signal	Corrected Intensity
K560_02_10		23		Small	100	30767	285.552	2211.79
				Big	196	58180
Cell	x,y	plane			Area	Total Intensity	Background Signal	Corrected Intensity		Cell AVG
K560_03_1		15		Small	100	37481	345.573	2923.71		2596.89
				Big	196	70656
Cell	x,y	plane			Area	Total Intensity	Background Signal	Corrected Intensity
K560_03_2		15		Small	100	35398	324.667	2931.33
				Big	196	66566
Cell	x,y	plane			Area	Total Intensity	Background Signal	Corrected Intensity
K560_03_3		15		Small	100	36133	331.615	2971.54
				Big	196	67968
Cell	x,y	plane			Area	Total Intensity	Background Signal	Corrected Intensity			AVG
K560_03_4		15		Small	100	38383	357.01	2681.96			STDEV
				Big	196	72656					SEM
											N
Cell	x,y	plane			Area	Total Intensity	Background Signal	Corrected Intensity
K560_03_5		15		Small	100	37670	350.969	2573.12
				Big	196	71363
Cell	x,y	plane			Area	Total Intensity	Background Signal	Corrected Intensity
K560_03_6		68		Small	100	29471	271.708	2300.17
				Big	196	55555
Cell	x,y	plane			Area	Total Intensity	Background Signal	Corrected Intensity
K560_03_7		68		Small	100	30564	285.938	1970.25
				Big	196	58014
Cell	x,y	plane			Area	Total Intensity	Background Signal	Corrected Intensity
K560_03_8		68		Small	100	29614	274.635	2150.46
				Big	196	55979
Cell	x,y	plane			Area	Total Intensity	Background Signal	Corrected Intensity
K560_03_9		68		Small	100	31672	290.792	2592.83
				Big	196	59588
Cell	x,y	plane			Area	Total Intensity	Background Signal	Corrected Intensity
K560_03_10		68		Small	100	30136	272.625	2873.5
				Big	196	56308
Cell	x,y	plane			Area	Total Intensity	Background Signal	Corrected Intensity		Cell AVG
K560_04_1		30		Small	100	31390	293.875	2002.5		2574.02
				Big	196	59602
Cell	x,y	plane			Area	Total Intensity	Background Signal	Corrected Intensity
K560_04_2		30		Small	100	33027	295.688	3458.25
				Big	196	61413
Cell	x,y	plane			Area	Total Intensity	Background Signal	Corrected Intensity
K560_04_3		30		Small	100	36850	325.552	4294.79
				Big	196	68103
Cell	x,y	plane			Area	Total Intensity	Background Signal	Corrected Intensity
K560_04_4		30		Small	100	36674	336.573	3016.71
				Big	196	68985
Cell	x,y	plane			Area	Total Intensity	Background Signal	Corrected Intensity
K560_04_5		30		Small	100	35228	323.51	2876.96
				Big	196	66285
Cell	x,y	plane			Area	Total Intensity	Background Signal	Corrected Intensity
K560_04_6		30		Small	100	29646	272.667	2379.33
				Big	196	55822
Cell	x,y	plane			Area	Total Intensity	Background Signal	Corrected Intensity
K560_04_7		30		Small	100	29365	270.406	2324.38
				Big	196	55324
Cell	x,y	plane			Area	Total Intensity	Background Signal	Corrected Intensity
K560_04_8		30		Small	100	28802	277.281	1073.88
				Big	196	55421
Cell	x,y	plane			Area	Total Intensity	Background Signal	Corrected Intensity
K560_04_9		30		Small	100	29334	279.542	1379.83
				Big	196	56170
Cell	x,y	plane			Area	Total Intensity	Background Signal	Corrected Intensity
K560_04_10		30		Small	100	30970	280.365	2933.54
				Big	196	57885
Cell	x,y	plane			Area	Total Intensity	Background Signal	Corrected Intensity		Cell AVG
K560_06_1		21		Small	100	36417	326.062	3810.75		2661.21
				Big	196	67719
Cell	x,y	plane			Area	Total Intensity	Background Signal	Corrected Intensity
K560_06_2		21		Small	100	35491	320.469	3444.12
				Big	196	66256
Cell	x,y	plane			Area	Total Intensity	Background Signal	Corrected Intensity
K560_06_3		21		Small	100	33420	301.406	3279.38
				Big	196	62355
Cell	x,y	plane			Area	Total Intensity	Background Signal	Corrected Intensity
K560_06_4		21		Small	100	38965	348.833	4081.67
				Big	196	72453
Cell	x,y	plane			Area	Total Intensity	Background Signal	Corrected Intensity
K560_06_5		21		Small	100	38307	338.219	4485.12
				Big	196	70776
Cell	x,y	plane			Area	Total Intensity	Background Signal	Corrected Intensity
K560_06_6		61		Small	100	28641	273.427	1298.29
				Big	196	54890
Cell	x,y	plane			Area	Total Intensity	Background Signal	Corrected Intensity
K560_06_7		61		Small	100	29538	284.021	1135.92
				Big	196	56804
Cell	x,y	plane			Area	Total Intensity	Background Signal	Corrected Intensity
K560_06_8		61		Small	100	28197	268.708	1326.17
				Big	196	53993
Cell	x,y	plane			Area	Total Intensity	Background Signal	Corrected Intensity
K560_06_9		61		Small	100	31007	294.354	1571.58
				Big	196	59265
Cell	x,y	plane			Area	Total Intensity	Background Signal	Corrected Intensity
K560_06_10		61		Small	100	32301	301.219	2179.12
				Big	196	61218
Cell	x,y	plane			Area	Total Intensity	Background Signal	Corrected Intensity		Cell AVG
K560_07_1		10		Small	100	38235	343.167	3918.33		2831.47
				Big	196	71179
Cell	x,y	plane			Area	Total Intensity	Background Signal	Corrected Intensity
K560_07_2		10		Small	100	37082	338.292	3252.83
				Big	196	69558
Cell	x,y	plane			Area	Total Intensity	Background Signal	Corrected Intensity
K560_07_3		10		Small	100	37979	331.115	4867.54
				Big	196	69766
Cell	x,y	plane			Area	Total Intensity	Background Signal	Corrected Intensity
K560_07_4		10		Small	100	34867	325.177	2349.29
				Big	196	66084
Cell	x,y	plane			Area	Total Intensity	Background Signal	Corrected Intensity
K560_07_5		10		Small	100	37660	349.031	2756.88
				Big	196	71167
Cell	x,y	plane			Area	Total Intensity	Background Signal	Corrected Intensity
K560_07_6		54		Small	100	27704	261.76	1527.96
				Big	196	52833
Cell	x,y	plane			Area	Total Intensity	Background Signal	Corrected Intensity
K560_07_7		54		Small	100	30464	282.938	2170.25
				Big	196	57626
Cell	x,y	plane			Area	Total Intensity	Background Signal	Corrected Intensity
K560_07_8		54		Small	100	28927	254.146	3512.42
				Big	196	53325
Cell	x,y	plane			Area	Total Intensity	Background Signal	Corrected Intensity
K560_07_9		54		Small	100	28262	265.229	1739.08
				Big	196	53724
Cell	x,y	plane			Area	Total Intensity	Background Signal	Corrected Intensity
K560_07_10		54		Small	100	31242	290.219	2220.12
				Big	196	59103
Cell	x,y	plane			Area	Total Intensity	Background Signal	Corrected Intensity		Cell AVG
K560_08_1		21		Small	100	29757	286.927	1064.29		1636.32
				Big	196	57302
Cell	x,y	plane			Area	Total Intensity	Background Signal	Corrected Intensity
K560_08_2		21		Small	100	30662	291.438	1518.25
				Big	196	58640
Cell	x,y	plane			Area	Total Intensity	Background Signal	Corrected Intensity
K560_08_3		21		Small	100	30332	285.167	1815.33
				Big	196	57708
Cell	x,y	plane			Area	Total Intensity	Background Signal	Corrected Intensity
K560_08_4		21		Small	100	31329	296.542	1674.83
				Big	196	59797
Cell	x,y	plane			Area	Total Intensity	Background Signal	Corrected Intensity
K560_08_5		21		Small	100	30795	293.479	1447.08
				Big	196	58969
Cell	x,y	plane			Area	Total Intensity	Background Signal	Corrected Intensity
K560_08_6		52		Small	100	29007	270.562	1950.75
				Big	196	54981
Cell	x,y	plane			Area	Total Intensity	Background Signal	Corrected Intensity
K560_08_7		52		Small	100	27509	262.656	1243.38
				Big	196	52724
Cell	x,y	plane			Area	Total Intensity	Background Signal	Corrected Intensity
K560_08_8		52		Small	100	27414	256.312	1782.75
				Big	196	52020
Cell	x,y	plane			Area	Total Intensity	Background Signal	Corrected Intensity
K560_08_9		52		Small	100	29415	278.229	1592.08
				Big	196	56125
Cell	x,y	plane			Area	Total Intensity	Background Signal	Corrected Intensity
K560_08_10		52		Small	100	28862	265.875	2274.5
				Big	196	54386
Cell	x,y	plane			Area	Total Intensity	Background Signal	Corrected Intensity		Cell AVG
K560_09_1		12		Small	100	35343	329.375	2405.5		2043.3
				Big	196	66963
Cell	x,y	plane			Area	Total Intensity	Background Signal	Corrected Intensity
K560_09_2		12		Small	100	36262	343.99	1863.04
				Big	196	69285
Cell	x,y	plane			Area	Total Intensity	Background Signal	Corrected Intensity
K560_09_3		12		Small	100	34416	328.229	1593.08
				Big	196	65926
Cell	x,y	plane			Area	Total Intensity	Background Signal	Corrected Intensity
K560_09_4		12		Small	100	35050	339.51	1098.96
				Big	196	67643
Cell	x,y	plane			Area	Total Intensity	Background Signal	Corrected Intensity
K560_09_5		12		Small	100	36332	337.552	2576.79
				Big	196	68737
Cell	x,y	plane			Area	Total Intensity	Background Signal	Corrected Intensity
K560_09_6		46		Small	100	33686	309.75	2711
				Big	196	63422
Cell	x,y	plane			Area	Total Intensity	Background Signal	Corrected Intensity
K560_09_7		46		Small	100	33249	303.854	2863.58
				Big	196	62419
Cell	x,y	plane			Area	Total Intensity	Background Signal	Corrected Intensity
K560_09_8		46		Small	100	30004	287.219	1282.12
				Big	196	57577
Cell	x,y	plane			Area	Total Intensity	Background Signal	Corrected Intensity
K560_09_9		46		Small	100	31731	298.698	1861.21
				Big	196	60406
Cell	x,y	plane			Area	Total Intensity	Background Signal	Corrected Intensity
K560_09_10		46		Small	100	31659	294.812	2177.75
				Big	196	59961
Cell	x,y	plane			Area	Total Intensity	Background Signal	Corrected Intensity		Cell AVG
K560_10_1		19		Small	100	38607	356.354	2971.58		2405.82
				Big	196	72817
Cell	x,y	plane			Area	Total Intensity	Background Signal	Corrected Intensity
K560_10_2		19		Small	100	37034	351.24	1910.04
				Big	196	70753
Cell	x,y	plane			Area	Total Intensity	Background Signal	Corrected Intensity
K560_10_3		19		Small	100	40795	372.823	3512.71
				Big	196	76586
Cell	x,y	plane			Area	Total Intensity	Background Signal	Corrected Intensity
K560_10_4		19		Small	100	37228	351.5	2078
				Big	196	70972
Cell	x,y	plane			Area	Total Intensity	Background Signal	Corrected Intensity
K560_10_5		19		Small	100	36342	345.104	1831.58
				Big	196	69472
Cell	x,y	plane			Area	Total Intensity	Background Signal	Corrected Intensity
K560_10_6		19		Small	100	40716	365.604	4155.58
				Big	196	75814
Cell	x,y	plane			Area	Total Intensity	Background Signal	Corrected Intensity
K560_10_6		19		Small	100	39438	362.417	3196.33
				Big	196	74230
Cell	x,y	plane			Area	Total Intensity	Background Signal	Corrected Intensity
K560_10_6		19		Small	100	37791	359.646	1826.42
				Big	196	72317
Cell	x,y	plane			Area	Total Intensity	Background Signal	Corrected Intensity
K560_10_6		19		Small	100	36889	351.156	1773.38
				Big	196	70600
Cell	x,y	plane			Area	Total Intensity	Background Signal	Corrected Intensity
K560_10_6		19		Small	100	36314	355.115	802.542
				Big	196	70405

## Sheet: Intensities
		K560	DHC	p50
		802.542	901.917	379.125							0		Bin	K560	DHC	p50
		900.625	936.833	430.208							1000		0	0	0	0
		943.625	1053.88	544.75							2000		1000	3.33333	2.38095	18.9189
		1064.29	1292.96	554.042							3000		2000	35.5556	29.7619	74.3243
		1073.88	1360.83	639.667							4000		3000	41.1111	38.0952	6.75676
		1098.96	1387.33	738.083							5000		4000	13.3333	17.8571	0
		1135.92	1470.79	785.167							6000		5000	6.66667	9.52381	0
		1243.38	1514.04	794.917							7000		6000	0	2.38095	0
		1282.12	1523.83	808.125							8000		7000	0	0	0
		1298.29	1524.58	856.167									8000	0	0	0
		1326.17	1551.08	942.708									More	0	0	0
		1379.83	1565.79	950.25
		1447.08	1569.83	992.458										100	100	100
		1450.29	1593.75	999.333
		1518.25	1599.38	1008
		1527.96	1609.88	1037.58
		1562.79	1612	1061.38
		1571.58	1720.33	1122
		1592.08	1740.29	1141.38
		1593.08	1748.79	1172.62
		1629.71	1794.04	1185.38
		1643	1880.21	1186.42
		1674.83	1902	1202.5
		1739.08	1935.54	1209.25
		1773.38	1937.29	1215.75
		1782.75	1945.92	1219.38
		1815.33	1958.96	1241.38
		1826.42	2028.71	1255.12
		1827.54	2043.96	1265.54
		1831.58	2059.33	1268.5
		1861.21	2070.5	1343.71
		1863.04	2114.75	1350.5
		1910.04	2119.88	1374.67
		1950.75	2156.88	1419.38
		1970.25	2179.04	1438.21
		2002.5	2205.83	1441.75
		2078	2252.29	1454.5
		2150.46	2406.67	1456.08
		2170.25	2408.33	1474.12
		2177.75	2423.79	1498
		2179.12	2427.67	1501.62
		2211.79	2446.88	1520.21
		2220.12	2470.42	1520.21
		2230.21	2499.92	1540.21
		2272.92	2547.71	1553.08
		2274.5	2551.88	1554.12
		2282.12	2597.79	1565.79
		2300.17	2618.54	1608.58
		2324.38	2634.21	1642.21
		2340.88	2648.33	1668.29
		2349.29	2661.08	1671.88
		2379.33	2700.33	1676.58
		2405.5	2703.08	1682.46
		2417.08	2761.88	1694.62
		2526.83	2787.42	1718.92
		2540.29	2808.54	1722.04
		2573.12	2847.25	1729.21
		2576.79	2942.96	1731.38
		2592.83	2943.67	1732.71
		2681.96	3002.29	1737
		2711	3170.38	1805.79
		2756.88	3174.92	1809.17
		2809.04	3175.79	1814.42
		2863.58	3208	1830.92
		2873.5	3303.5	1870.42
		2876.96	3348.58	1891.96
		2923.71	3374.38	1911.79
		2931.33	3384.12	1957.54
		2933.54	3542.67	1974.92
		2971.33	3624.79	2028.42
		2971.54	3671.67	2102.96
		2971.58	3704.75	2135.17
		3016.71	3819.46	2190.5
		3196.33	3889.92	2247.33
		3252.83	4009.79
		3279.38	4074.79
		3444.12	4212.17
		3458.25	4496.75
		3487.04	4496.75
		3512.42	4587.75
		3512.71	4685.75
		3773.71	4877.5
		3810.75	5164.25
		3918.33	5334.58
		4081.67
		4155.58
		4294.79
		4485.12
		4681.38
		4867.54
		K560	DHC	p50
	AVG	2377.69	2607.58	1402.71
	STDEV	915.609	1018.04	431.89
	SEM	96.5137	111.078	50.2062
	N	90	84	74
	Plots of Differences	1	0.32	<0.001
		0.302	1	<0.001
		<0.001	<0.001	1
	Normaility tests	4/6	1/6	6/6

## Sheet: All summary 
	Run Time			Velocity			Run Length				Fluoresence Intensities				Plots of differences summary
	DHC	p50		DHC	p50		DHC	p50			K560	DHC	p50
	2.2	2.2		0.98	1.89		2.156	4.158			802.542	901.917	379.125		p-value greater than 0.05 for:
	1.4	1.6		2.1	1.11		2.94	1.776			900.625	936.833	430.208		Run times of DHC vs p50
	4	2		1.4	0.975		5.6	1.95			943.625	1053.88	544.75		Velocities of DHC vs p50
	2.8	1.6		1.63	2.06		4.564	3.296			1064.29	1292.96	554.042		Run lengths of DHC vs p50
	2.2	1.4		1.02	0.79		2.244	1.106			1073.88	1360.83	639.667		Intensities of K560 vs DHC
	2.4	2.8		1.6	1.81		3.84	5.068			1098.96	1387.33	738.083
	0.8	2.6		1.5	1.71		1.2	4.446			1135.92	1470.79	785.167		p-value less than 0.001 for:
	1.2	1.2		0.9	1.11		1.08	1.332			1243.38	1514.04	794.917		Intensities of K560 vs p50
	1.2	2.2		1.82	1.69		2.184	3.718			1282.12	1523.83	808.125		Intensities of DHC vs p50
	1.6	4		0.73	0.68		1.168	2.72			1298.29	1524.58	856.167
	3	1.6		0.975	1.19		2.925	1.904			1326.17	1551.08	942.708
	2.2	1.4		1.14	1.95		2.508	2.73			1379.83	1565.79	950.25
	2.8	1		1.1	0.98		3.08	0.98			1447.08	1569.83	992.458
	2	2.2		2.23	1.66		4.46	3.652			1450.29	1593.75	999.333
	1.8	2.2		1.25	1.44		2.25	3.168			1518.25	1599.38	1008
	1.8	2.2		1.66	0.85		2.988	1.87			1527.96	1609.88	1037.58
	3.2	2.8		1.88	1.12		4.576	3.136			1562.79	1612	1061.38
	2.2	3.6		1.48	0.79		3.212	2.844			1571.58	1720.33	1122
	2.4	2		1.43	0.57		4.512	1.14			1592.08	1740.29	1141.38
	1.6	1.8		0.72	1.08		1.04	1.944			1593.08	1748.79	1172.62
	2.6	6.4		1.46	1		2.808	6.4			1629.71	1794.04	1185.38
	1.6	1.6		1.88	0.71		2.944	1.136			1643	1880.21	1186.42
	3.2	3.2		0.65	0.98		3.392	3.136			1674.83	1902	1202.5
	2.6	3.4		1.08	0.73		3.146	2.482			1739.08	1935.54	1209.25
	2	3.8		1.84	0.87		1.96	3.306			1773.38	1937.29	1215.75
	1.4	1.8		1.06	1.06		1.932	2.34			1782.75	1945.92	1219.38
	2.2	3.2		1.21	1.3		3.3	5.696			1815.33	1958.96	1241.38
	2.4	2.6		0.98	0.98		1.44	1.56			1826.42	2028.71	1255.12
	0.8	2.2		1.38	1.78		1.76	2.288			1827.54	2043.96	1265.54
	2	2.2		1.5	0.6		2.8	1.716			1831.58	2059.33	1268.5
	1.8	2		0.6	1.04		4.518	1.54			1861.21	2070.5	1343.71
	2.2	1.6		2.2	0.78		2.178	4			1863.04	2114.75	1350.5
	1.6	1		1.4	1.58		2.544	1.46			1910.04	2119.88	1374.67
	2.4	1.8		2.51	0.77		2.088	2.34			1950.75	2156.88	1419.38
	1.4	1.4		0.99	2.5		1.106	1.974			1970.25	2179.04	1438.21
	1.8	1.2		1.59	1.46		3.852	1.716			2002.5	2205.83	1441.75
	1.6	2.8		0.87	1.3		0.592	3.248			2078	2252.29	1454.5
	1.8	1.8		0.79	1.41		3.51	1.908			2150.46	2406.67	1456.08
	1.8	1.2		0.84	1.43		3.168	1.944			2170.25	2408.33	1474.12
	7.2	1.4		2.14	1.16		5.328	1.484			2177.75	2423.79	1498
	3.6	2.4		0.37	1.06		1.692	2.376			2179.12	2427.67	1501.62
	2.4			1.95	1.62		2.016				2211.79	2446.88	1520.21
	6.6			1.76	1.06		4.686				2220.12	2470.42	1520.21
	4.2			0.74	0.99		1.932				2230.21	2499.92	1540.21
	2.2			0.57			1.166				2272.92	2547.71	1553.08
	8.6			0.89			4.042				2274.5	2551.88	1554.12
	2			0.47			1.7				2282.12	2597.79	1565.79
	3.4			0.84			2.21				2300.17	2618.54	1608.58
	1.4			0.51			1.036				2324.38	2634.21	1642.21
	1.6			0.85			2.6				2340.88	2648.33	1668.29
	1.4			0.71			1.918				2349.29	2661.08	1671.88
	1.4			0.46			1.596				2379.33	2700.33	1676.58
	1.2			0.53			1.872				2405.5	2703.08	1682.46
	2			0.47			2.42				2417.08	2761.88	1694.62
	1.6			1.23			3.648				2526.83	2787.42	1718.92
	2.4			0.47			2.04				2540.29	2808.54	1722.04
	1.4			0.85			1.652				2573.12	2847.25	1729.21
	2			0.65			2.46				2576.79	2942.96	1731.38
	1.6			0.8			1.936				2592.83	2943.67	1732.71
	2.8			0.74			2.324				2681.96	3002.29	1737
	1.4			1.625			2.548				2711	3170.38	1805.79
	2.4			1.37			1.848				2756.88	3174.92	1809.17
	1.6			1.14			3.12				2809.04	3175.79	1814.42
	2.6			1.56			3.12				2863.58	3208	1830.92
	2.4			1.21			2.808				2873.5	3303.5	1870.42
	1.6			2.28			1.728				2876.96	3348.58	1891.96
	4			0.85			6.16				2923.71	3374.38	1911.79
	1.6			1.18			1.936				2931.33	3384.12	1957.54
	2.2			1.23			2.86				2933.54	3542.67	1974.92
	4			1.21			7.52				2971.33	3624.79	2028.42
	6.8			1.37			8.568				2971.54	3671.67	2102.96
	2			2.06			1.78				2971.58	3704.75	2135.17
	2			1.73			1.88				3016.71	3819.46	2190.5
	2.8			0.83			2.24				3196.33	3889.92	2247.33
	3.4			1.82			1.292				3252.83	4009.79
	4			1.48			2.48				3279.38	4074.79
	2.6			0.77			2.314				3444.12	4212.17
	7.2			1.95			4.464				3458.25	4496.75
	2.4			1.2			2.352				3487.04	4496.75
	5.8			1.17			4.872				3512.42	4587.75
	6.6			1.08			5.346				3512.71	4685.75
				1.54							3773.71	4877.5
				1.21							3810.75	5164.25
				1.3							3918.33	5334.58
				1.88							4081.67
				1.26							4155.58
				0.89							4294.79
				0.94							4485.12
				0.8							4681.38
				0.38							4867.54
				0.62
				0.89
				0.62
				0.51
				0.35
				0.65
				0.7
				0.98
				0.84
				0.81
	Run Time			Velocity			Run Length				Fluoresence Intensities
	DHC	p50		DHC	p50		DHC	p50			K560	DHC	p50
AVG	2.59753	2.22927		1.1666	1.21875		2.82809	2.60946		AVG	2377.69	2607.58	1402.71
STDEV	1.56189	1.01544		0.505282	0.438185		1.45475	1.26347		STDEV	915.609	1018.04	431.89
SEM	0.173543	0.158585		0.0505282	0.0660589		0.161639	0.197321		SEM	96.5137	111.078	50.2062
N	81	41		100	44		81	41		N	90	84	74
										Plots of Differences	1	0.32	<0.001
											0.302	1	<0.001
											<0.001	<0.001	1
										Normaility tests	4/6	1/6	6/6
